# Supplementary material for: Synthesis, Antibacterial, and Antioxidant Activities of Thiazolyl-Pyrazoline Schiff Base Hybrids: A Combined Experimental and Computational Study
Source: Hindawi journal article supplement (doi:10.1155/2022/3717826), 2022-09-27
Supplement: f1 [file 3717826.f1.doc]

**Supporting Information**

**Synthesis, antibacterial and antioxidant activities of thiazolyl-pyrazoline Schiff base hybrids: a combined experimental and computational study**

**DemisZelelew1,Milkyas Endale1*,Yadessa Melaku1,Fedlu Kedir1,TayeB. Demissie2,Japheth O. Ombito2,Rajalakshmanan Eswaramoorthy3**

*1Department of Applied Chemistry, School of Applied Natural Science, Adama Science and Technology University, P.O. Box 1888, Adama, Ethiopia*

*2 Department of Chemistry, University of Botswana, Notwane Rd, P/bag UB 00704, Gaborone, Botswana*

*3 Department of Biomaterials, Saveetha Dental College and Hospital, Saveetha University, Chennai 600 077, India*

E-mail: milkyas.endale@astu.edu.et, milkyasendale@yahoo.com

**Table of content**

**Appendix A**

**Fig. 1:** Synthesized natural product privileged scaffolds(chalcone derivatives) by Claisen-Schmidt condensation reaction**(3-5)**

**Fig. 2:** Synthesized 2-amino-4-(substituted-phenyl)-1,3-thiazolederivatives by solvent free modified Hantzschthiazole synthesis reaction and their NMR spectral data (**10-12**)

**Fig. 3:** Synthesized 3,5-diphenyl-4,5-dihydro-*1H*-pyrazol-1-carbaldehydes derivatives by 1,4-Michael addition of hydrazine on chalconeanalogs, followed by cyclization and dehydrationand their NMR spectral data **(13-15)**

**Fig. 4:** Synthesized thiazolyl-pyrazoline Schiff base hybrids derived from chalcone derivatives by ZnO-NPs assisted Schiff basereaction condition (**16-24**)

**Table 3.**Recycling study of ZnO NPs solid catalyst for the model reaction

**Table 7.** *In silico*Molecular docking scores and residual amino acid interactions of synthesized compounds (**16-24**) against *E. coli* Gyrase B. (PDB ID: 6f86).

**Table 8.***In silico*Molecular docking scores and residual amino acid interactions of synthesized compounds (**16-24**) against the N-terminal domain of PqsA in complex with 6-fluoroanthraniloyl-AMP (crystal form 1) (PDB ID:5oe3).

**Table 9.***In silico* Molecular docking studies of synthesized compounds (16-24) against *S. aureus* Pyruvate Kinase in complex with a naturally occurring bis-indole alkaloid (PDB ID: 3t07).

**Table 10.***In silico*Molecular docking studies of synthesized compounds (**16-24**) against LuxS of *S. pyogenes* (Uniprot id: P0C0C7).

**Table 11.** *In silico*Molecular docking studies of synthesized compounds (**16-24**) against Human peroxiredoxin 5 (PDB ID: 1hd2).

**Appendix B.**

**Fig. 1-45**: 1H and 13C­_NMR spectrum (400 MHz, CDCl3and DMSO-*d6*) of compound**3-24**

**Appendix C.**

**Fig. 6.***In vitro* antibacterial activity of thiazolyl-pyrazoline Schiff base hybrids (**16-24**) against pathological strains expressed as inhibition diameter zones in millimeters (unit, mm)

**Fig. 7.** Bioavailability radar of the title compounds,**16-24** by the druglikeness criteria

**Fig. 8.** Boiled-Egg model of the title compounds,**16-24** by the drug-likeness criteria

**Appendix D**

**Fig 5a-e, 1-10.**Molecular docking scores and 3D (right) and 2D (left) representations of the binding interactions of synthesized compounds(**16-24**) and amoxicillin against target proteins

**LIST OF APPENDIXS**

**Appendix A**

**Fig. 1:** Synthesized natural product privileged scaffolds(chalcone derivatives) byClaisen-Schmidt condensation reaction**(3-5)**

**Fig. 2:** Synthesized 2-amino-4-(substituted-phenyl)-1,3-thiazolederivatives by solvent free modified Hantzschthiazole synthesis reaction and their NMR spectral data (**10-12**)

**Fig. 3:** Synthesized 3,5-diphenyl-4,5-dihydro-*1H*-pyrazol-1-carbaldehydes derivatives by 1,4-Michael addition of hydrazine on chalconeanalogs, followed by cyclization and dehydrationand their NMR spectral data **(13-15)**

**Fig. 4:** Synthesized thiazolyl-pyrazoline Schiff base hybrids derived from chalconederivatives by ZnO-NPs assisted Schiff basereaction condition(**16-24**)

**Table 3.**Recycling study of ZnO NPs solid catalyst for the model reaction

| **Entry** | **Time (h)** | **Synthesized compounds, 16-24isolated**  **Yield (%)a** |  |
| --- | --- | --- | --- |
| **Fresh** | 3 | 92 |  |
| **Run 1** | 3 | 90 |  |
| **Run 2** | 3 | 90 |  |
| **Run 3** | 3 | 86 |  |
| **Run 4** | 3 | 86 |  |
| **Run 5** | 3 | 82 |  |
| **Run 6** | 3 | 82 |  |

aYields are related to isolated pure products.

#### Table 7. In silicoMolecular docking scores and residual amino acid interactions of synthesized compounds (16-24) against E. coli Gyrase B. (PDB ID: 6f86).

| **Synthesized compounds (Ligands)** | **Docking scores/Affinity**  **(kcal/mol)** | **H-bonds** | **Amino acid residual interactions** | |
| --- | --- | --- | --- | --- |
| **Hydrophobic/π-cation/**  **π-anion/ π-alkyl interactions** | **Van der Waals interactions** |
| **16** | **-7.6** | Ile-94, Val-97, Ser-121, Val-120 | Pro-79, Ile-78 | Thr-165, Asp-73, Gly-119, Leu-98 |
| **17** | **-7.9** | Arg-76, Gly-77, Asp-73, Asn-46, Gly-117, Val-118, Leu-98 | Glu-50, Asp-49, Ile-94, le-78 | -- |
| **18** | **-7.8** | Glu-50, Arg-76, Asp-73 | Ala-53, Ile-94, Asn-46, Ile-78, Asp-49 | Thr-165, Gly-75, Gly-77 |
| **19** | **-8.0** | Val-120, Ser-121 | Ile-78, Pro-79, Ile-94 | Val-97, Gly-119, Leu-98, Asp-73, Thr-165, Gly-77 |
| **20** | **-7.8** | Val-120, Ser-121 | Ile-78, Pro-79, Ile-94 | Asp-73, Thr-165, Asn-46, Gly-119, Val-97, Leu-98, Gly-77, Asp-49 |
| **21** | **-7.9** | Asp-73, Arg-76, Glu-50 | Asn-46, Asp-49, Ala-53, Ile-94, Ile-78 | Thr-165, Gly-77, Gly-75 |
| **22** | **-8.5** | Asp-49, Asn-46, Glu-50, Gly-77, Arg-76, Asp-73 | Ala-53, Ile-78, Ile-94 | Gly-75, Thr-165, Val-120 |
| **23** | **-7.4** | Glu-50, Atg-76, Gly-77, Asp-73 | Ile-94, Ala-90, Val-93, Pro-79, Ile-78 | Arg-136, Thr-165 |
| **24** | **-7.9** | Glu-50, Arg-76, Asp-73, Asn-46 | Ile-94, Asp-49, Ala-53, Ile-78, Gly-77 | Thr-165, Gly-75 |
| **Amoxicillin** | **-7.1** | Asn-46, Leu-98, Val-120, Ser-121 | Ile-78 | Asp-73, Ile-94, Val-97, Gly-119 |

**Table 8.***In silico*Molecular docking scores and residual amino acid interactions of synthesized compounds (**16-24**) against the N-terminal domain of PqsA in complex with 6-fluoroanthraniloyl-AMP (crystal form 1) (PDB ID:5oe3).

| **Synthesized compounds (Ligands)** | **Docking scores \Affinity**  **(kcal/mol)** | **H-bonds** | **Amino acid residual interactions** | |
| --- | --- | --- | --- | --- |
| **Hydrophobic/π-cation/**  **π-anion/ π-alkyl interactions** | **Van der Waals interactions** |
| **16** | **-7.8** | Lys-206, Ile-204 | Ile-257, Val-254, Pro-234, Pro-205, Phe-208, Trp-233 | Phe-209 |
| **17** | **-9.5** | Ser-63, Asn-61, Pro-85, Ser-87 | Ala-108, Glu-107, Ala-110, Asp-231, Ala-124, Arg-128, Ala-126 | Gly-127, Glu-89, Arg-106, Lys-86, Pro-111, Phe-134, Ser-65, Leu-66, Leu-60, Ala-125 |
| **18** | **-8.0** | Gly-169, Arg-88 | Trp-233, Ala-91, Pro-171 | Phe-208, Phe-209, Tyr-163, Ile-95, Asp-94 |
| **19** | **-9.6** | Asn-61, Ser-65 | Thr-232, Ala-108, Ala-126, Ala-124, Arg-128, Leu-60 | Lys-86, Gly-127, Asp-231, Glu-107, Phe-134, Leu-66, Ser-63 |
| **20** | **-9.5** | Asn-61, Ser-65 | Thr-232, Ala-108, Ala-126, Ala-124, Arg-128, Leu-60 | Lys-86, Gly-127, Asp-231, Glu-107, Phe-134, Leu-66, Ser-63 |
| **21** | **-8.1** | Glu-89, Arg-88 | Trp-233, Lys-86, Ala-91 | Ser-87 |
| **22** | **-10.7** | Ala-108, Tyr-25, Ser-63, Pro-129, Asn-61 | Thr-232, Arg-128, Asp-231, Asp-132, Ala-124, Ala-126 | Glu-107, Ser-65, Ala-125, Gly-127, Lys-86 |
| **23** | **-9.6** | Pro-129, Tyr-25, Ser-63, Asp-132, Asn-61, Lys-86, Arg-106, Pro-85, Ser-87 | Glu-107, Ala-110, Ala-124, Arg-128, Ala-108, Ala-126 | Gly-27, Ala-125, Ser-65, Asp-231, Glu-89 |
| **24** | **-9.9** | Asp-299, Thr-323 | Ile-301, Pro-281, Ser-280, Val-254, Phe-209, Gly-279, Ala-303 | Gly-300, His-394, Arg-397, Thr-380, Tyr-378, Glu-305, Thr-304 |
| **Amoxicillin** | **-7.3** | Arg-372, Tyr-378, Thr-380, Arg-397 | Phe-209, Gly-302 | Gly-279, Ala-303, Glu-305 |

**Table 9.***In silico* Molecular docking studies of synthesized compounds (16-24) against *S. aureus* Pyruvate Kinase in complex with a naturally occurring bis-indole alkaloid (PDB ID: 3t07).

| **Synthesized compounds (Ligands)** | **Docking scores /Affinity**  **(kcal/mol)** | **H-bonds** | **Amino acid residual interactions** | |
| --- | --- | --- | --- | --- |
| **Hydrophobic/π-cation/**  **π-anion/ π-alkyl interactions** | **Van der Waals interactions** |
| **16** | **-5.5** | Ala-358, Asn-465 | Met-466, Met-467, Ile-359 | Ser-362, Thr-427, Val-456 |
| **17** | **-4.8** | Asn-369 | His-365, Ile-361, Ala-358 | Ser-362 |
| **18** | **-5.5** | Thr-461, Gly-459, Lys-390, Asn-357 | -- | Th-463, Ser-381, Thr-458, Gly-462, Ser-383, Val-356 |
| **19** | **-5.0** | Asn-465, Ala- 358, Ser-362 | Met-466, Met-467, Ile-359 | Thr-427, Val-456 |
| **20** | **-5.5** | Lys-390, Leu-269, Thr-387 | Arg-386, Ser-381 | Gly-462, Ser-383, Lys-271, Thr-463 |
| **21** | **-5.2** | Asn-465, Val-456, Ile-469 | Leu-431, Lys-468 | Met-467 |
| **22** | **-5.9** | Glu-380, Gly-459, Gly-462, Ser-383 | Pro-402, Lys-425 | Ser-381, Thr-461, Thr-458, Gly-423 |
| **23** | **-6.4** | Gly-462, Ser-383, Thr-458 | Glu-380, Pro-402, Lys-425, Gly-459 | -- |
| **24** | **-5.0** | Ser-362, Ala-358 | Ile-361, Met-467, Thr-366 | His-365, Asn-369, Ile-359 |
| **Amoxicillin** | **-4.7** | Ala-358, Thr-464 | Leu-355, Ile359 | Asn-465, Ser-362 |

**Table 10.***In silico*Molecular docking studies of synthesized compounds (**16-24**) against LuxS of *S. pyogenes* (Uniprot id: P0C0C7).

| **Synthesized compounds (Ligands)** | **Docking scores /Affinity**  **(kcal/mol)** | **H-bonds** | **Amino acid residual interactions** | |
| --- | --- | --- | --- | --- |
| **Hydrophobic/π-cation/**  **π-anion/ π-alkyl interactions** | **Van der Waals interactions** |
| **16** | **-4.0** | His-61, Gly-121 | Gly-128, Cys-127, Ala-64, His-57 | Ser-126 |
| **17** | **-3.7** | His-57 | His-61, Cys-127, Ala-64 | Pro-120, Arg-68, Asn-129 |
| **18** | **-4.7** | Glu-60, Cys-77 | His-57, Ser-126, His-61, Ala-64 |  |
| **19** | **-4.5** | His-57, Cys-127, His-61 | Ala-64 | Gly-128, Gly-121 |
| **20** | **-4.0** | -- | His-61, Pro-120, Ala-64, Gly-121 | Gly-128, Glu-60, Thr-122, Val-119 |
| **21** | **-5.1** | His-61 | Ser-126, Glu-60, His-57, Ala-64 | Pro-120, Lys-65, Cys-127, Gly-128 |
| **22** | **-4.2** | Thr-122 | Cys-127, His-61, Ala-64, Pro-120 | Gly-128, Thr-123 |
| **23** | **-4.0** | Gly-128, His-57, Glu-60 | Ala-64, His-61, Cys-127 | Asn-129, Gly-121, Pro-120 |
| **24** | **-3.9** | Cys-77 | Ser-126, His-61, His-57, Cys-127, Ala-64, Asp-76 | Pro-120, Gly-121, Gly-128, Asn-129 |
| **Amoxicillin** | **-5.5** | Asp-132, Asn-129, Cys-127, His-57, Gly-128, Ser-126, His-61 | Pro-79, Leu-56 | Glu-60, Phe-80 |

#### Table 11. In silicoMolecular docking studies of synthesized compounds (16-24) against Human peroxiredoxin 5 (PDB ID: 1hd2).

| **Synthesized compounds (Ligands)** | **Docking scores /Affinity**  **(kcal/mol)** | **H-bonds** | **Amino acid residual interactions** | |
| --- | --- | --- | --- | --- |
| **Hydrophobic/π-cation/**  **π-anion/ π-alkyl interactions** | **Van der Waals interactions** |
| **16** | **-6.7** | Gly-92, Gln-68, Lys-63, Val-70, Lys-93 | Arg-86, Glu-91, Glu-16, Arg-95, Val-69 | Gly-17, Asn-21, Val-94 |
| **17** | **-7.4** | Glu-18, Asn-21, Gly-92, Val-70, Lys-93, Lys-63 | Arg-86, Ala-90, Arg-95, Glu-16 | Gly-85, Leu-96, Gly-17, Gln-68, Val-69, Val-94, Glu-91 |
| **18** | **-7.4** | Arg-86, Val-70, Lys-63, Lys-93 | Leu-96, Ala-90, Glu-91, Glu-16 | Gly-82, Gly-92 |
| **19** | **-7.2** | Lys-93, Lys-63, Gln-68, Gly-92, Val-94 | Arg-86, Glu-16, Arg-95, Val-69 | Asn-21, Gly-17, Leu-96, Glu-91, Val-70 |
| **20** | **-7.2** | Gly-92, Lys-93, Gln-68, Lys-63 | Arg-86, Glu-16, Arg-95, Val-69 | Asn-21, Leu-96, Val-94, Val-70 |
| **21** | **-7.8** | Arg-86, Gly-92, Lys-63, Gln-68 | Glu-91, Glu-16, Ala-90, Leu-96 | Gly-85, Gly-82, Arg-95, Lys-93, Val-69, Val-70, Val-94 |
| **22** | **-7.5** | Glu-16, Arg-95, Lys-63, Val-70, Lys-93 | Leu-96, Val-69, Glu-91, Ala-90 | Gly-85, Gln-68, Val-94, AsN-21 |
| **23** | **-7.2** | Val-70, Lys-93, Gly-92, Lys-22 | Val-69, Lys-32, Leu-28, Val-23 | Lys-63, Gln-68, Glu-27, Asn-24, Arg-95 |
| **24** | **-7.3** | Gln-68, Lys-63, Gly-92, Arg-86 | Arg-95, Glu-16, Glu-91, Ala-90, Leu-96 | Val-94, Gly-85, Gly-82, Lys-93, Val-69, Val-70 |
| **Vitamin C** | **-5.5** | Gly-92, Val-94, Ala-90, Glu-16, Gly-82, Arg-86, Glu-91 | -- | Arg-95, Lys-93, Leu-96, Gly-85 |

**Appendix B**

Fig. 1: 1H-NMR spectrum (400 MHz, CDCl3and DMSO-*d6*) of compound**3**

Fig. 2: 13C -NMR spectrum (100 MHz, CDCl3 and DMSO-*d6*) of compound**3**

Fig. 3: 1H-NMR spectrum (400 MHz, CDCl3and DMSO-*d6*) of compound**4**

Fig. 4: 13C -NMR spectrum (100 MHz, CDCl3 and DMSO-*d6*) of compound**4**

Fig. 5: 1H-NMR spectrum (400 MHz, CDCl3and DMSO-*d6*) of compound**5**

Fig.6: 13C -NMR spectrum (100 MHz, CDCl3 and DMSO-*d6*) of compound**5**

Fig. 7: 1H-NMR spectrum (400 MHz, CDCl3and DMSO-*d6*) of compound**10**

Fig. 8: 13C -NMR spectrum (100 MHz, CDCl3 and DMSO-*d6*) of compound**10**

Fig. 9: 1H-NMR spectrum (400 MHz, CDCl3and DMSO-*d6*) of compound**11**

Fig. 10: 13C -NMR spectrum (100 MHz, CDCl3 and DMSO-*d6*) of compound**11**

Fig. 11: 1H-NMR spectrum (400 MHz, CDCl3and DMSO-*d6*) of compound**12**

Fig. 12: 13C -NMR spectrum (100 MHz, CDCl3 and DMSO-*d6*) of compound**12**

Fig.13: 1H-NMR spectrum (400 MHz, CDCl3and DMSO-*d6*) of compound**13**

Fig. 14: 13C -NMR spectrum (100 MHz, CDCl3 and DMSO-*d6*) of compound**13**

Fig. 15: 1H-NMR spectrum (400 MHz, CDCl3and DMSO-*d6*) of compound**14**

Fig.16: 13C -NMR spectrum (100 MHz, CDCl3 and DMSO-*d6*) of compound**14**

Fig. 17: 1H-NMR spectrum (400 MHz, CDCl3and DMSO-*d6*) of compound**15**

Fig.18: 13C -NMR spectrum (100 MHz, CDCl3 and DMSO-*d6*) of compound**15**

Fig. 19: UV-Visible spectrum of compound **16**

Fig. 20: 1H-NMR spectrum (400 MHz, CDCl3and DMSO-*d6*) of compound**16**

Fig. 21: 13C -NMR spectrum (100 MHz, CDCl3 and DMSO-*d6*) of compound**16**

Fig. 22: UV-Visible spectrum of compound **17**

Fig. 23: 1H-NMR spectrum (400 MHz, CDCl3and DMSO-*d6*) of compound**17**

Fig. 24: 13C -NMR spectrum (100 MHz, CDCl3 and DMSO-*d6*) of compound**17**

Fig. 25: UV-Visible spectrum of compound **18**

Fig. 26: 1H-NMR spectrum (400 MHz, CDCl3and DMSO-*d6*) of compound**18**

Fig. 27: 13C -NMR spectrum (100 MHz, CDCl3 and DMSO-*d6*) of compound**18**

Fig. 28: UV-Visible spectrum of compound **19**

Fig. 29: 1H-NMR spectrum (400 MHz, CDCl3and DMSO-*d6*) of compound**19**

Fig. 30: 13C -NMR spectrum (100 MHz, CDCl3 and DMSO-*d6*) of compound**19**

Fig. 31: UV-Visible spectrum of compound **20**

Fig. 32: 1H-NMR spectrum (400 MHz, CDCl3and DMSO-*d6*) of compound **20**

Fig. 33: 13C -NMR spectrum (100 MHz, CDCl3 and DMSO-*d6*) of compound **20**

Fig. 34: UV-Visible spectrum of compound **21**

Fig. 35: 1H-NMR spectrum (400 MHz, CDCl3and DMSO-*d6*) of compound **21**

Fig. 36: 13C -NMR spectrum (100 MHz, CDCl3 and DMSO-*d6*) of compound**21**

Fig. 37: UV-Visible spectrum of compound **22**

Fig. 38: 1H-NMR spectrum (400 MHz, CDCl3and DMSO-*d6*) of compound**22**

Fig. 39: 13C -NMR spectrum (100 MHz, CDCl3 and DMSO-*d6*) of compound**22**

Fig. 40: UV-Visible spectrum of compound **23**

Fig. 41: 1H-NMR spectrum (400 MHz, CDCl3and DMSO-*d6*) of compound**23**

Fig. 42: 13C -NMR spectrum (100 MHz, CDCl3 and DMSO-*d6*) of compound**23**

Fig. 43: UV-Visible spectrum of compound **24**

Fig. 44: 1H-NMR spectrum (400 MHz, CDCl3and DMSO-*d6*) of compound**24**

Fig. 45: 13C -NMR spectrum (100 MHz, CDCl3 and DMSO-*d6*) of compound**24**

**Appendix C**

**Fig. 6.***In vitro* antibacterial activity of thiazolyl-pyrazoline Schiff base hybrids (**16-24**) against pathological strains expressed as inhibition diameter zones in millimeters (unit, mm) based on agar well diffusion assay compared to positive control (amoxicillin) and negative control (DMSO), results given in µg/mL sample


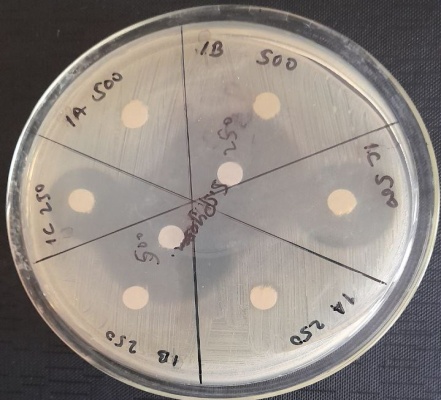

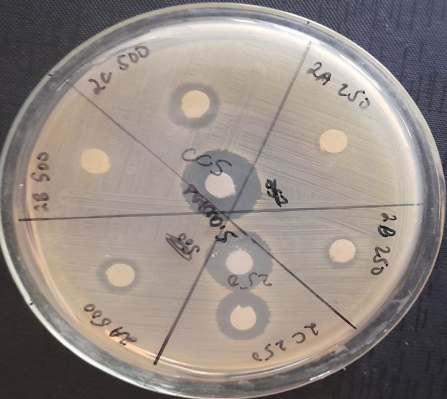

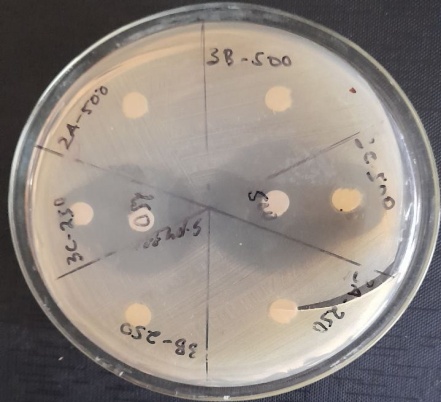


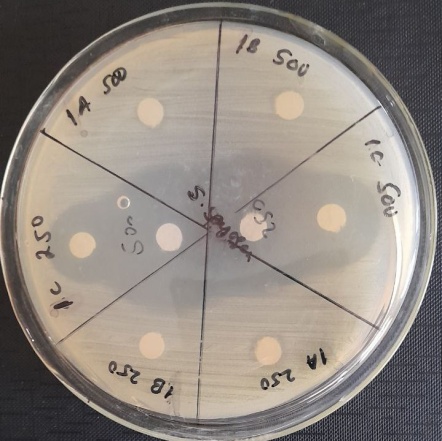

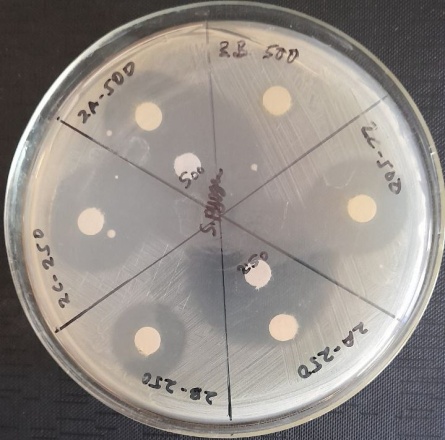

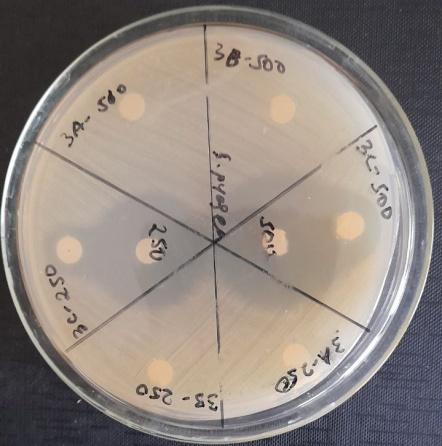


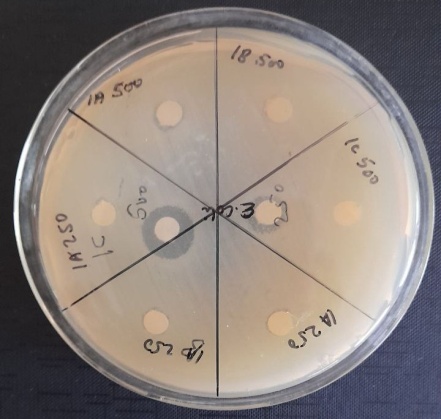

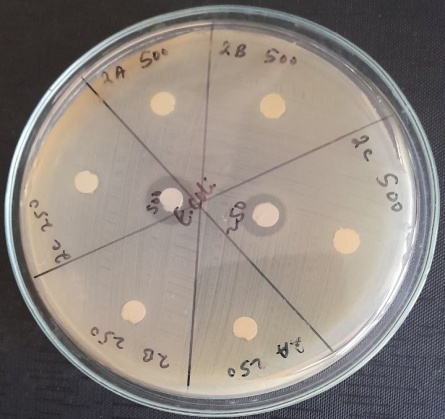

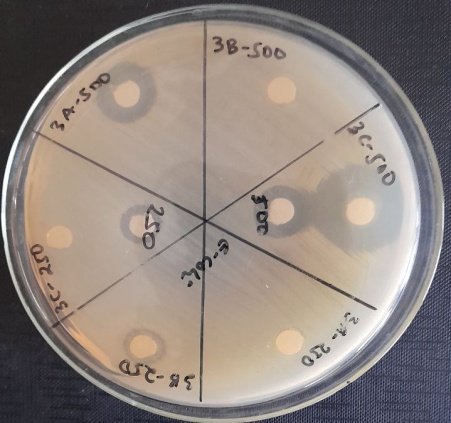


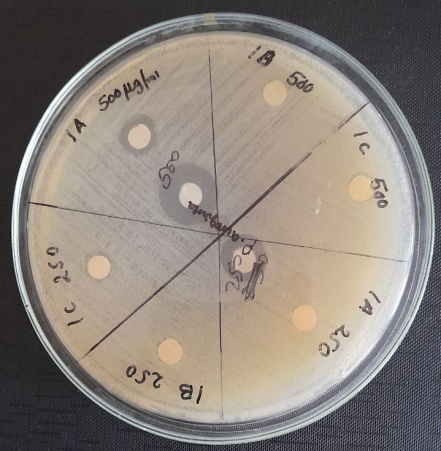

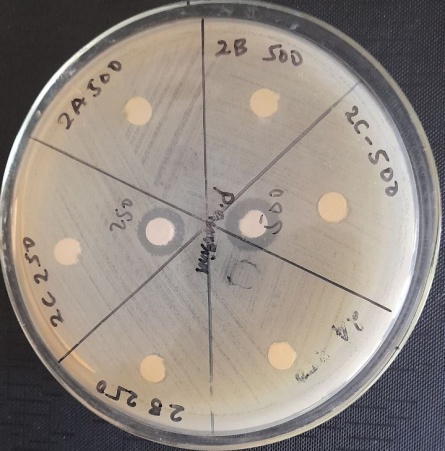

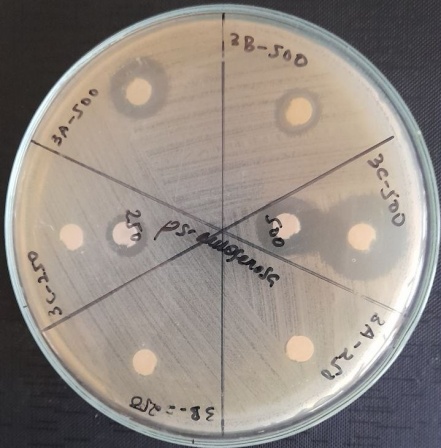


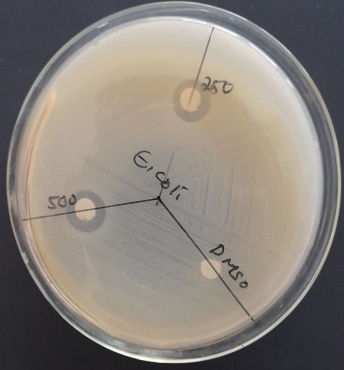

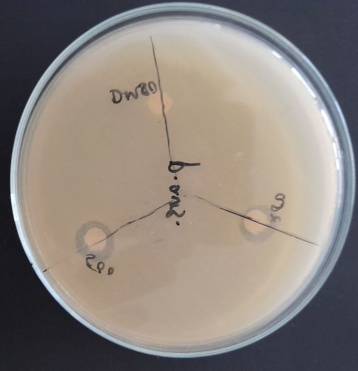

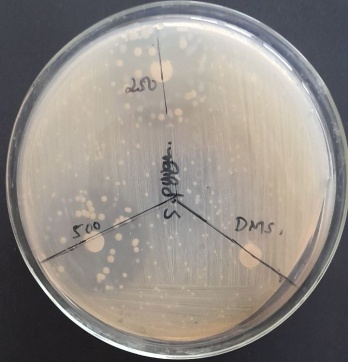

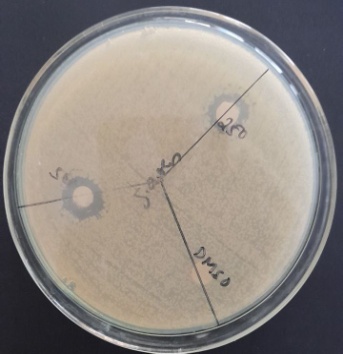


**N.B.**Gram-positive bacteria, *Staphylococcus aureus*(ATCC 25923)and*Streptococcus pyogenes*(ATCC 27853)andGram-negative bacteria, *Escherichia coli* (ATCC 25922) and *Pseudomonas aeruginosa* (ATCC 27853)respectively

**Fig. 7.** Bioavailability radar of the title compounds,**16-24** by the druglikeness criteria (Lipophilicity (− 0.7 < log P < 5.0), size (150 g/mol<MW < 500 g/mol), polarity (20˚A² < TPSA<140˚A²), insolubility (− 6<logS< 0), insaturação (0.25<Fraction Csp3<1) and flexibility (0 < Num. rotatable bonds < 9).


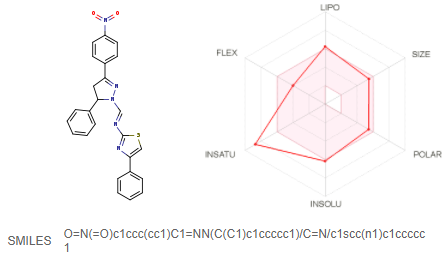

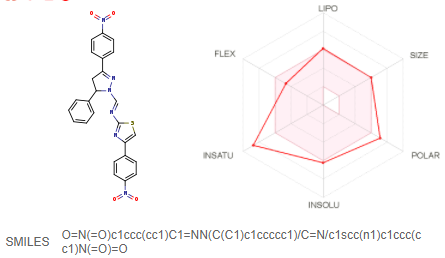


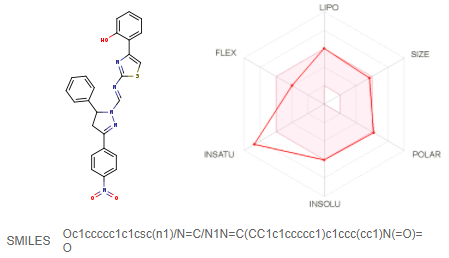

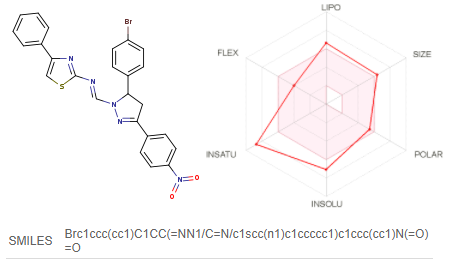


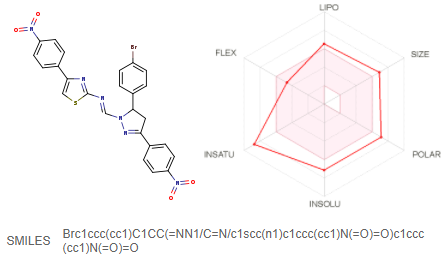

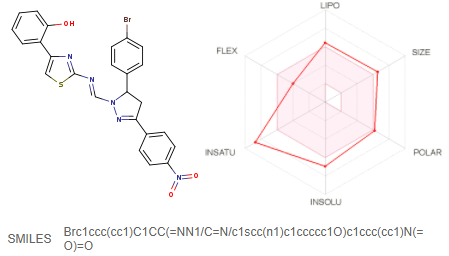


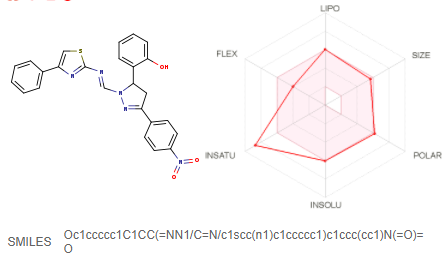

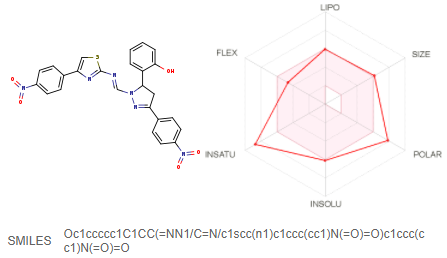


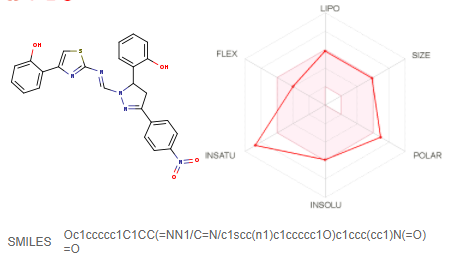

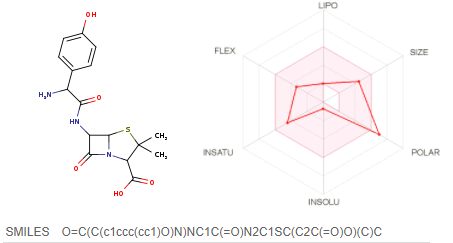


**Fig. 8.** Boiled-Egg model of the title compounds,**16-24** by the drug-likeness criteria (Lipophilicity (− 0.7 < log P < 5.0), size (150 g/mol<MW < 500 g/mol), polarity (20˚A² < TPSA<140˚A²), insolubility (− 6<logS<0), insaturação (0.25<Fraction Csp3<1) and flexibility (0 < Num. rotatable bonds < 9).


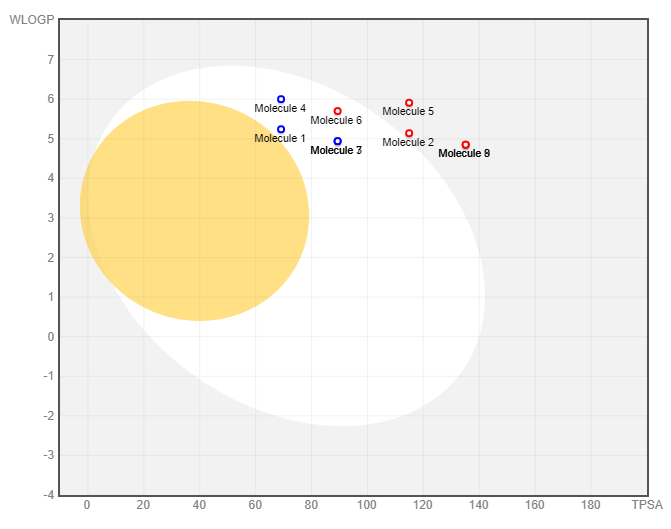


**Appendix D**

**Fig 5a, 1-10.** 3D (right) and 2D (left) representations of the binding interactions of **16-24**and amoxicillin against *E. coli* DNA Gyrase B (PDB ID: 6f861)

**Fig 1.** 3D (right) and 2D (left) representations of the binding interactions of **16** against *E. coli* DNA Gyrase B (PDB ID: 6f861)

**
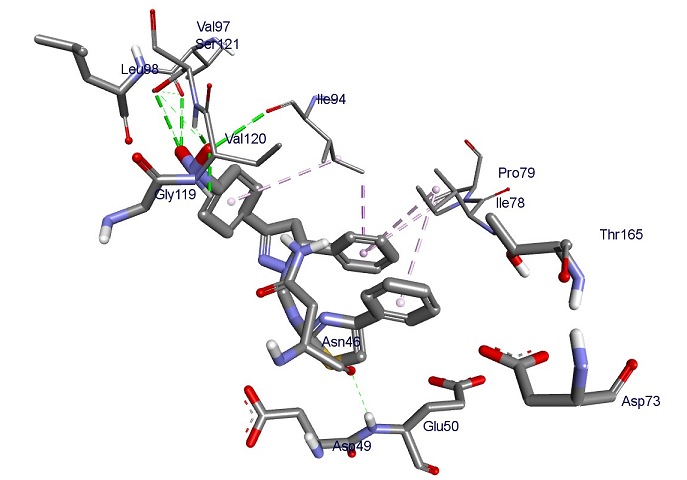

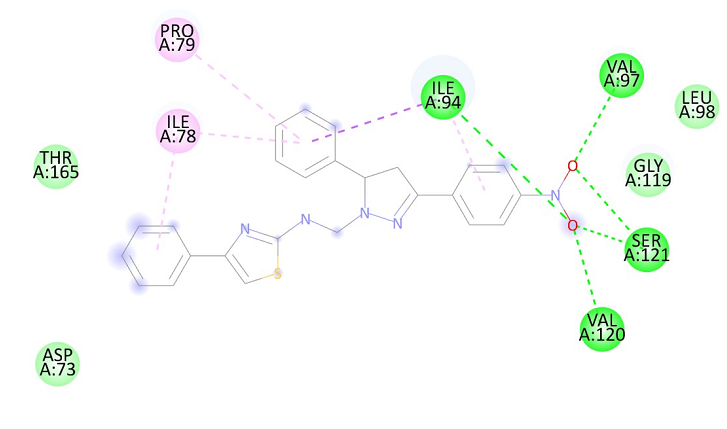
**

**Fig 2.** 3D (right) and 2D (left) representations of the binding interactions of **17** against *E. coli* DNA Gyrase B (PDB ID: 6f861)

**
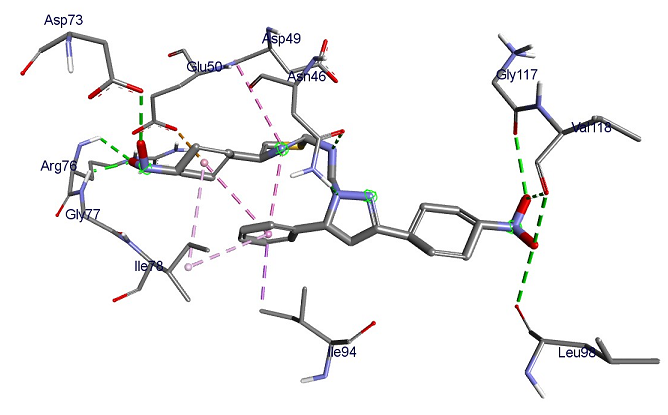

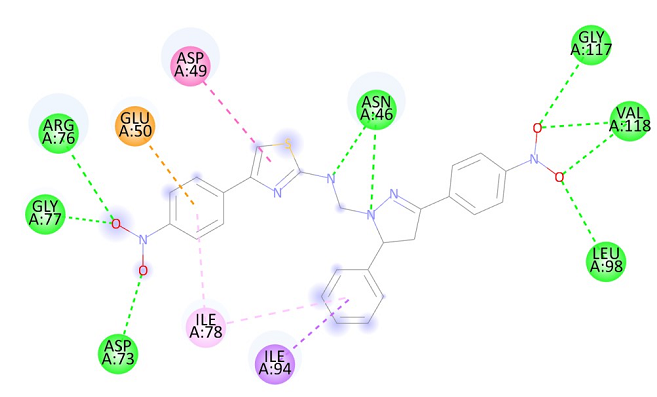
**

**Fig 3.** 3D (right) and 2D (left) representations of the binding interactions of **18** against *E. coli* DNA Gyrase B (PDB ID: 6f861)


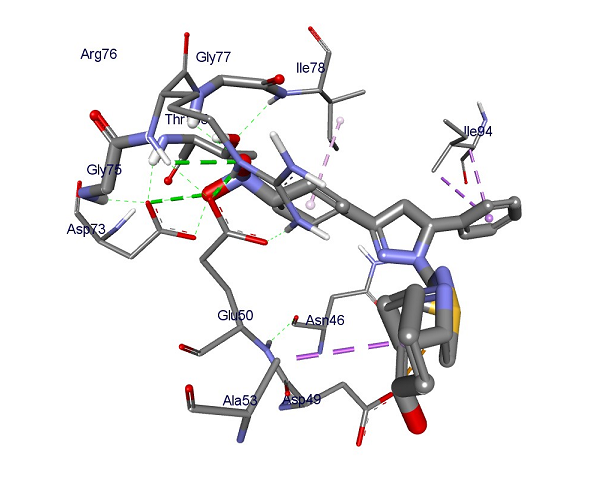

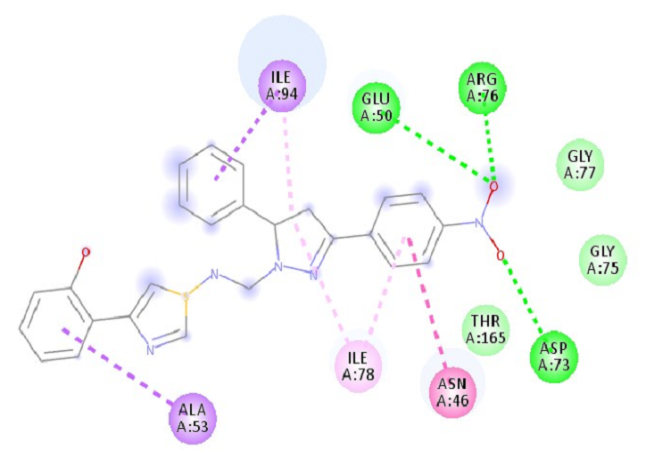


**Fig 5.** 3D (right) and 2D (left) representations of the binding interactions of **19**against *E. coli* DNA Gyrase B (PDB ID: 6f861)


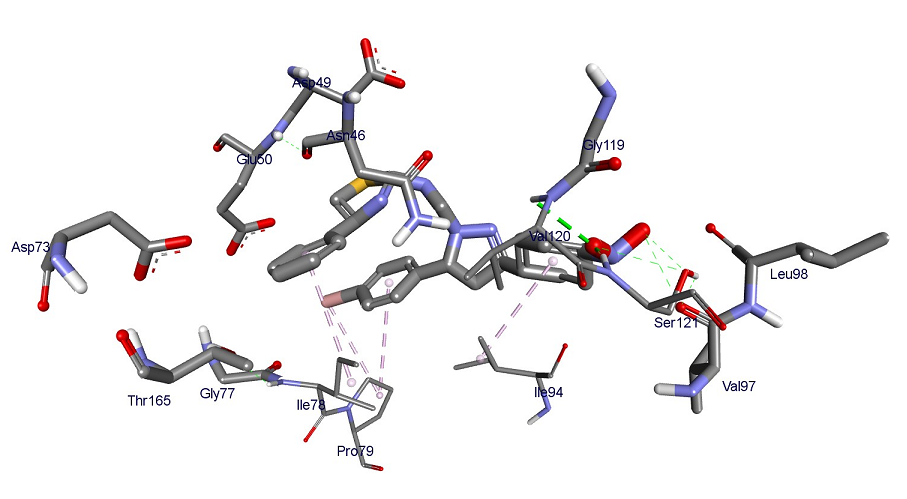

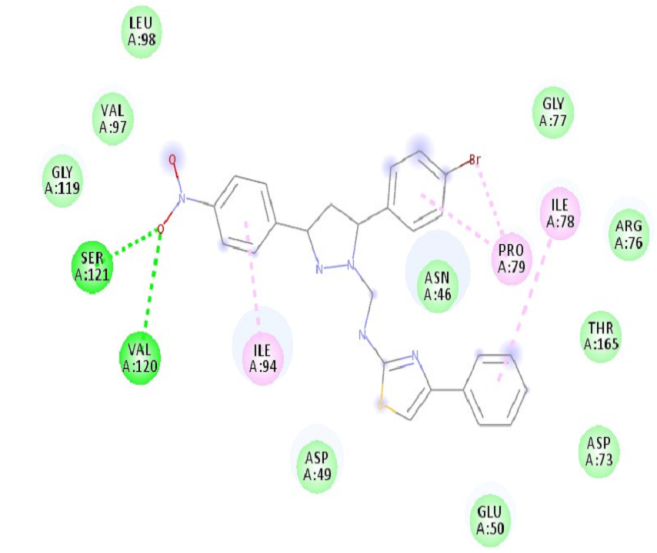


**Fig 5.** 3D (right) and 2D (left) representations of the binding interactions of **20**against *E. coli* DNA Gyrase B (PDB ID: 6f861)

**
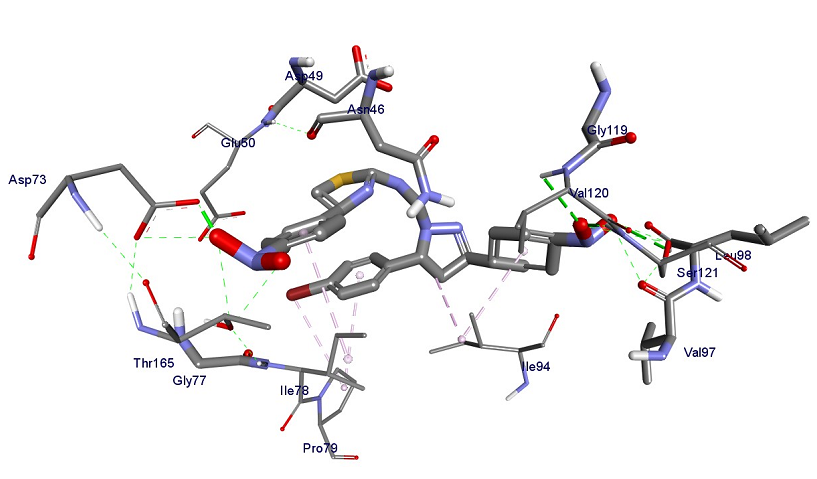

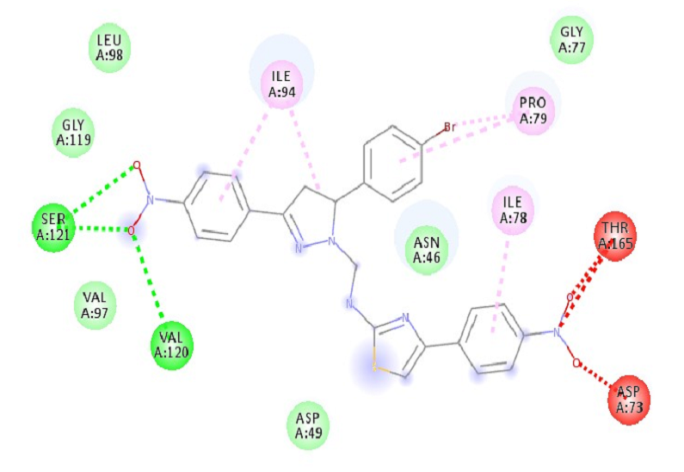
**

**Fig 6.** 3D (right) and 2D (left) representations of the binding interactions of **21**against *E. coli* DNA Gyrase B (PDB ID: 6f861)

**
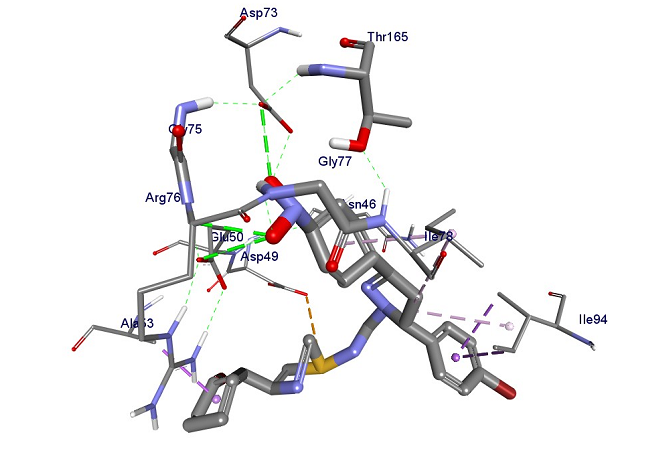

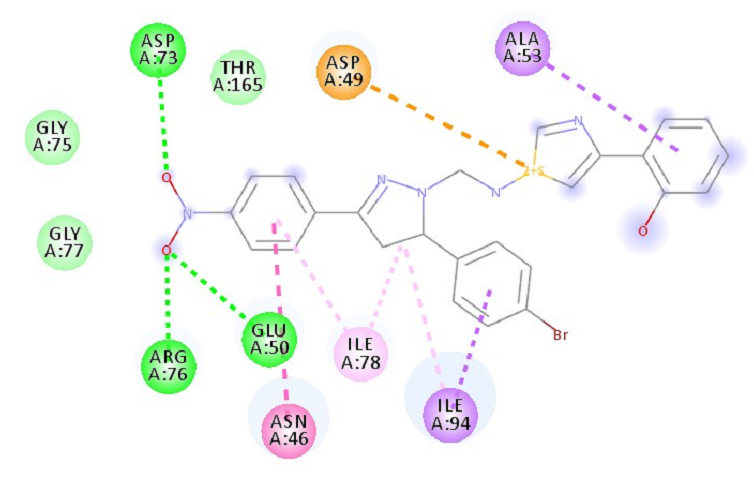
**

**Fig 7.** 3D (right) and 2D (left) representations of the binding interactions of **22**against *E. coli* DNA Gyrase B (PDB ID: 6f861)

**
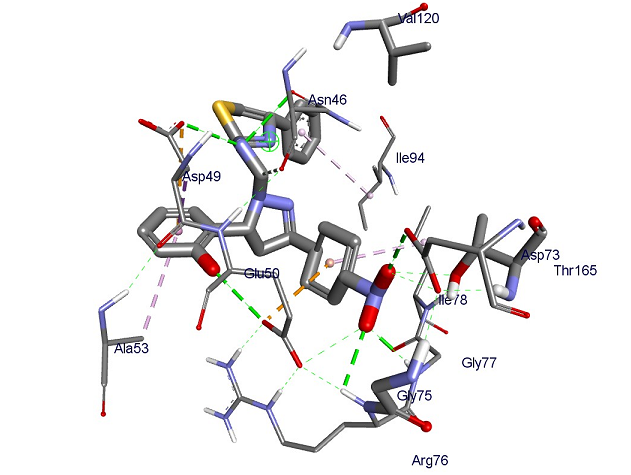

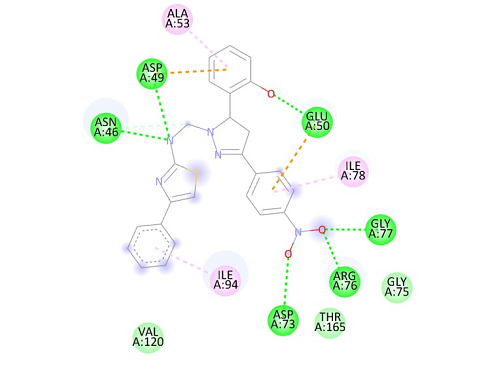
**

**Fig 8.** 3D (right) and 2D (left) representations of the binding interactions of **23**against *E. coli* DNA Gyrase B (PDB ID: 6f861)

**
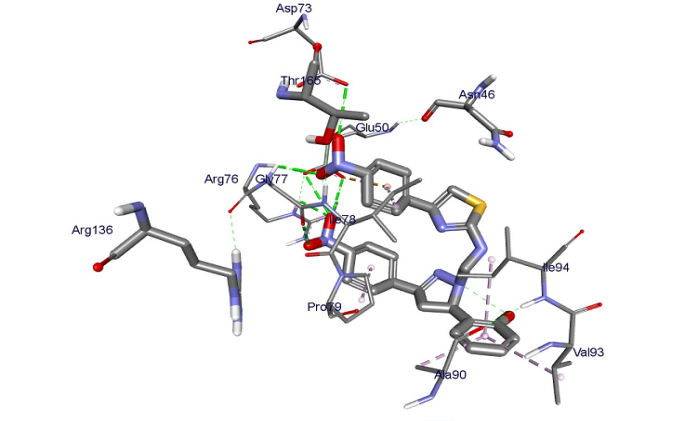

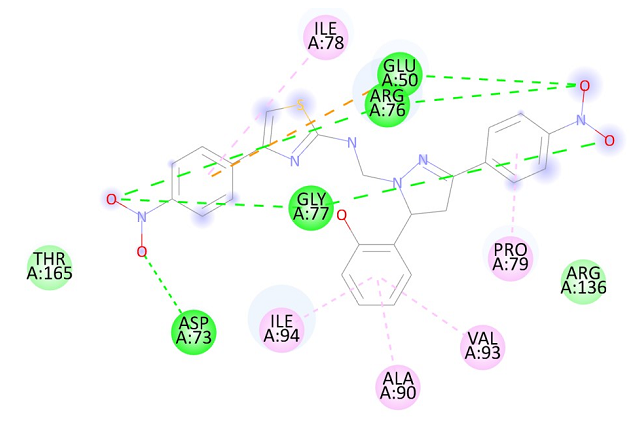
**

**Fig 9.** 3D (right) and 2D (left) representations of the binding interactions of **24**against *E. coli* DNA Gyrase B (PDB ID: 6f861)

**
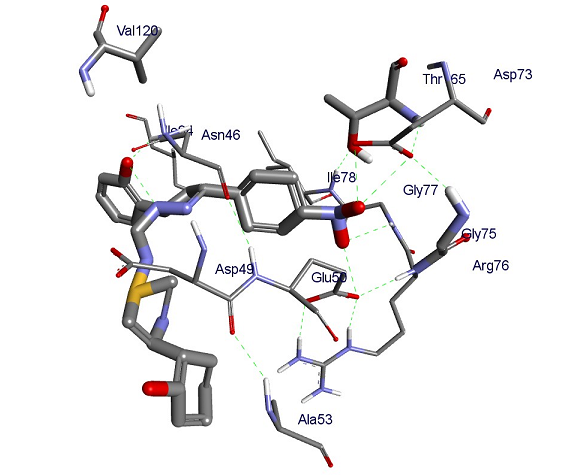

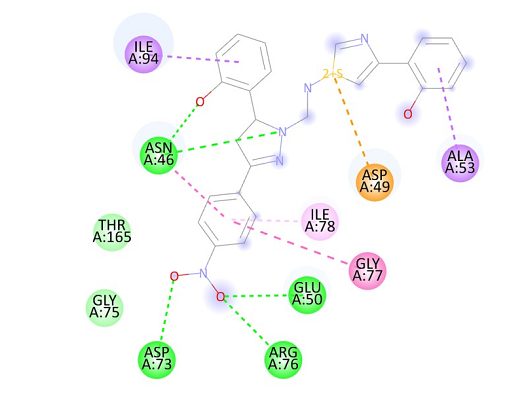
**

**Fig 10.** 3D (right) and 2D (left) representations of the binding interactions of **amoxicillin** drug against *E. coli* DNA Gyrase B (PDB ID: 6f861)


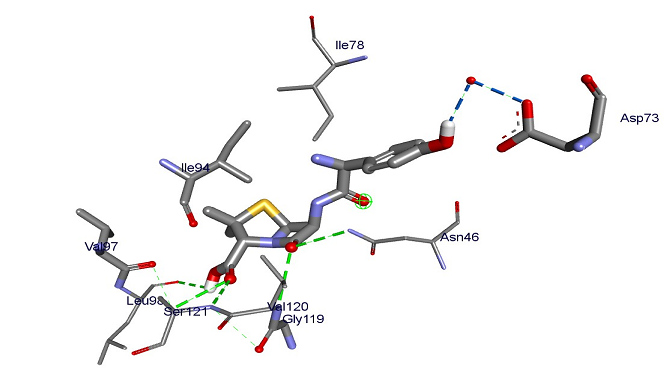

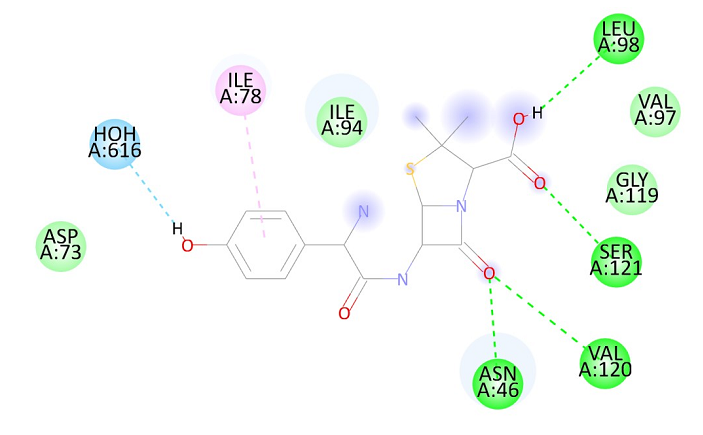


**Fig 5b, 1-10.** 3D (right) and 2D (left) representations of the binding interactions of **16-24**and amoxicillin against N-terminal domain of PqsA in complex with 6-fluoroanthraniloyl-AMP (crystal form 1) (PDB ID:5oe3)

**Fig 1.** 3D (right) and 2D (left) representations of the binding interactions of **16**against N-terminal domain of PqsA in complex with 6-fluoroanthraniloyl-AMP (crystal form 1) (PDB ID:5oe3)


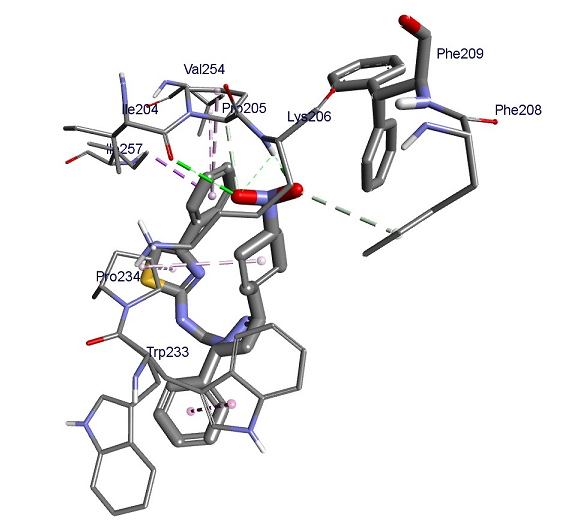

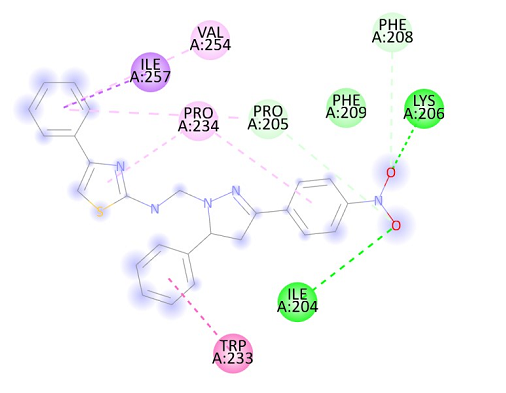


**Fig 2.** 3D (right) and 2D (left) representations of the binding interactions of **17**against N-terminal domain of PqsA in complex with 6-fluoroanthraniloyl-AMP (crystal form 1) (PDB ID:5oe3)


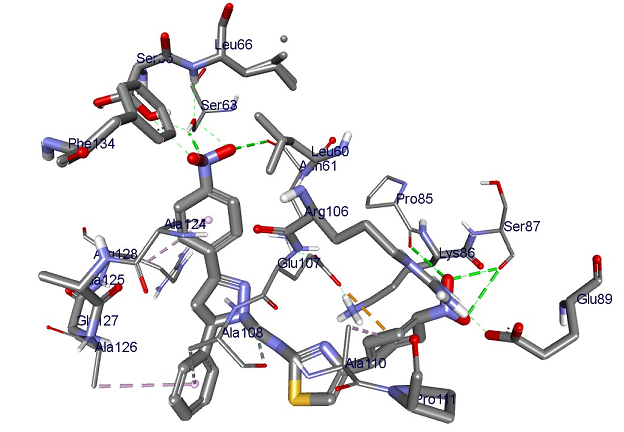

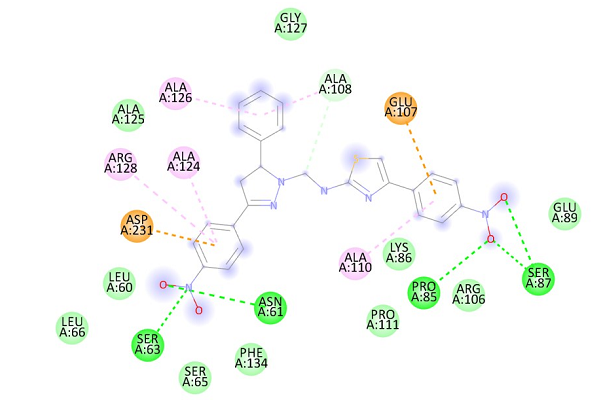


**Fig 3.** 3D (right) and 2D (left) representations of the binding interactions of **18**against N-terminal domain of PqsA in complex with 6-fluoroanthraniloyl-AMP (crystal form 1) (PDB ID:5oe3)


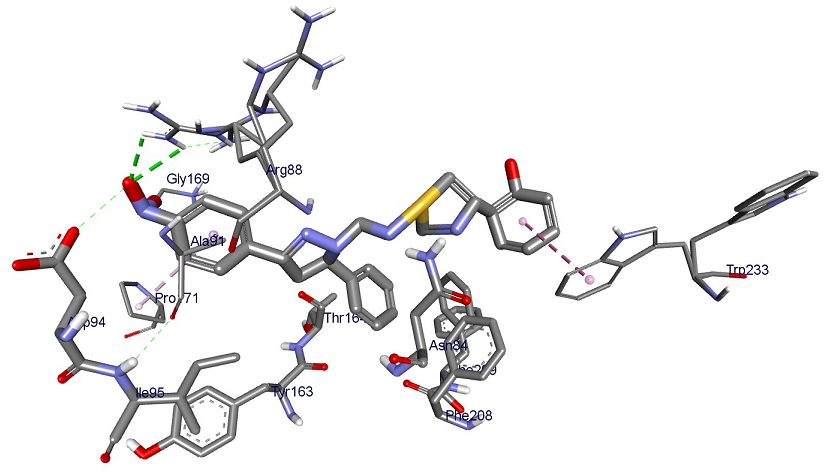

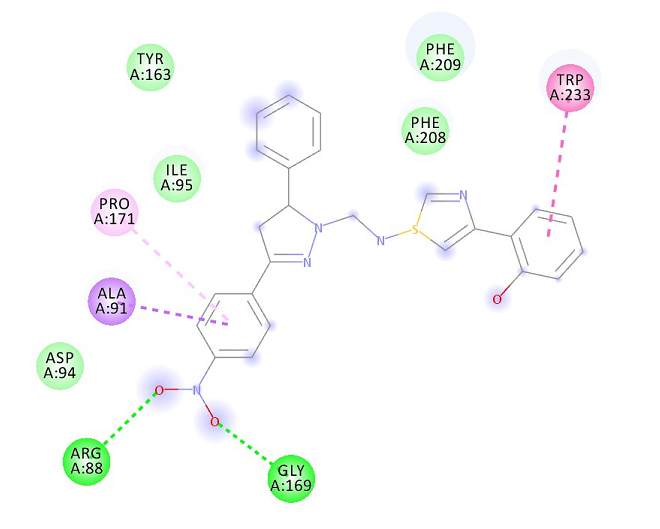


**Fig 4.** 3D (right) and 2D (left) representations of the binding interactions of **19**against N-terminal domain of PqsA in complex with 6-fluoroanthraniloyl-AMP (crystal form 1) (PDB ID:5oe3)


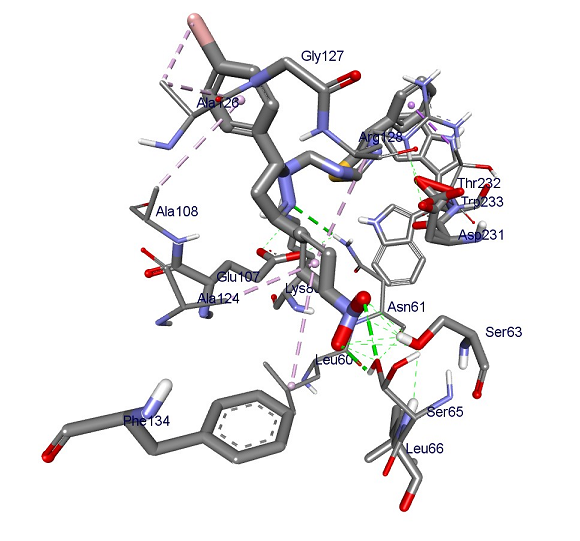

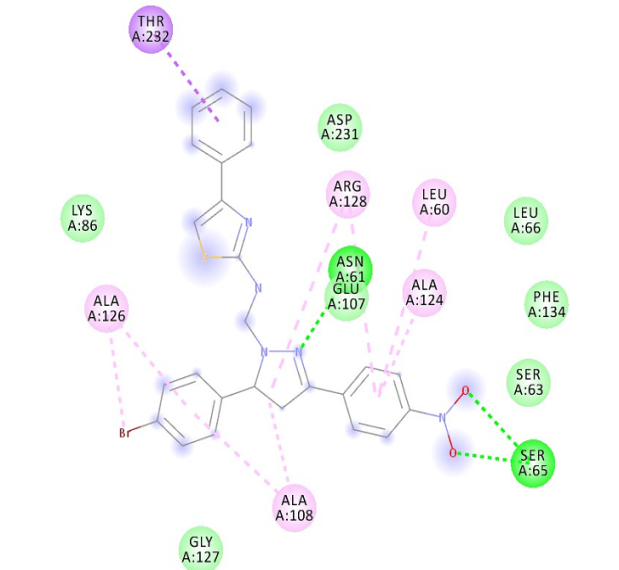


**Fig 5.** 3D (right) and 2D (left) representations of the binding interactions of **20**against N-terminal domain of PqsA in complex with 6-fluoroanthraniloyl-AMP (crystal form 1) (PDB ID:5oe3)


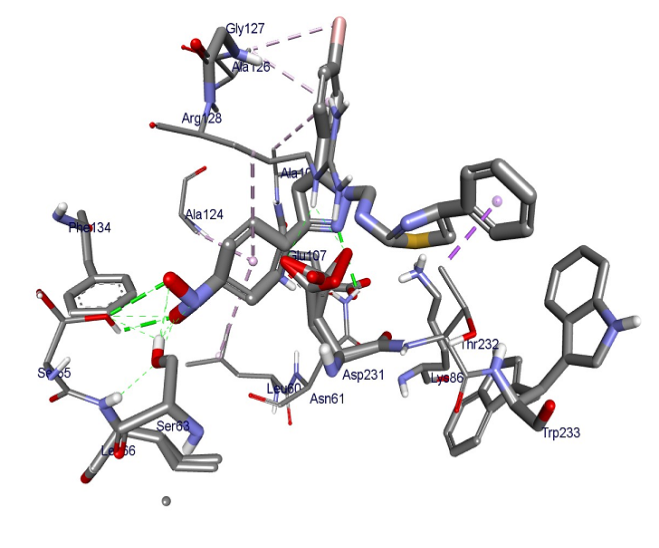

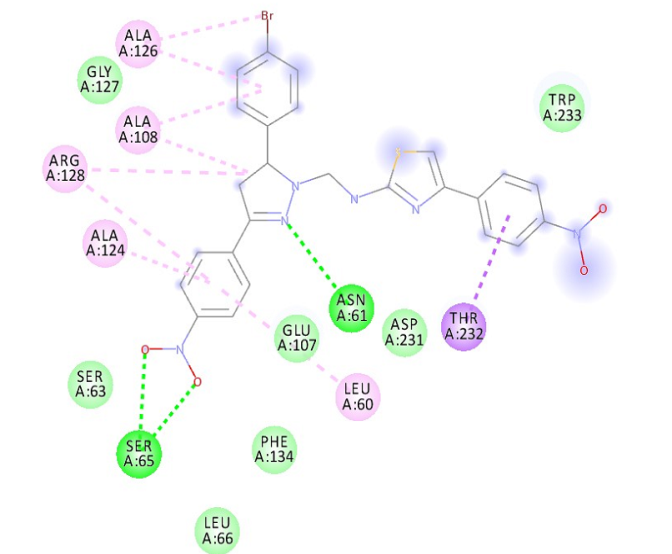


**Fig 6.** 3D (right) and 2D (left) representations of the binding interactions of**21**against N-terminal domain of PqsA in complex with 6-fluoroanthraniloyl-AMP (crystal form 1) (PDB ID:5oe3)


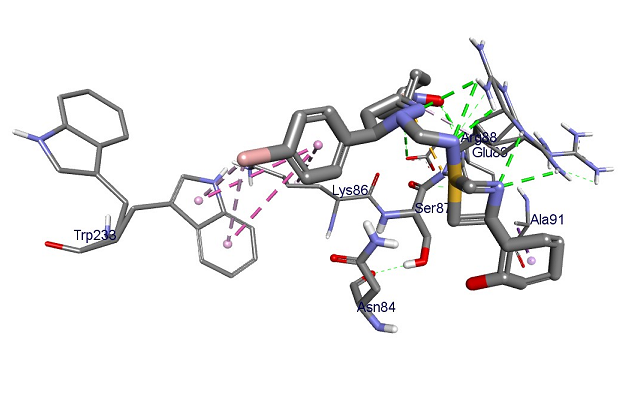

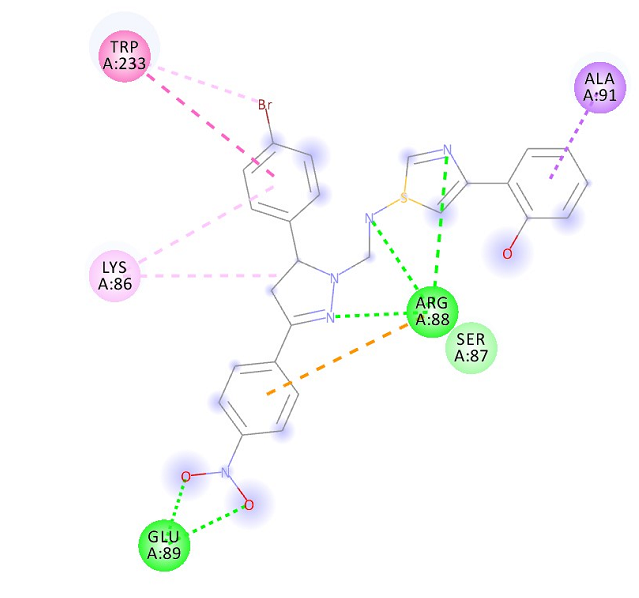


**Fig 7.** 3D (right) and 2D (left) representations of the binding interactions of **22**against N-terminal domain of PqsA in complex with 6-fluoroanthraniloyl-AMP (crystal form 1) (PDB ID:5oe3)


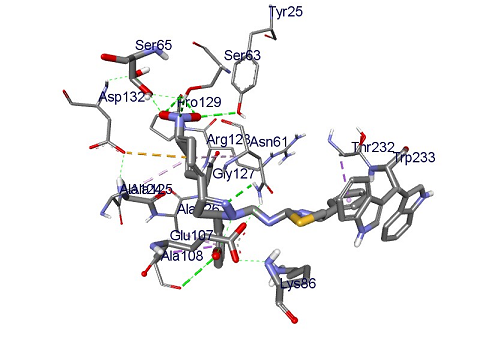

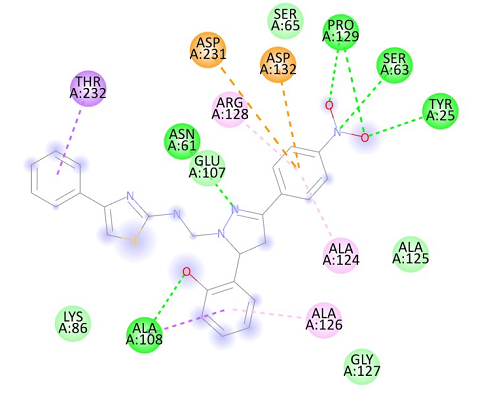


**Fig 8.** 3D (right) and 2D (left) representations of the binding interactions of **23**against N-terminal domain of PqsA in complex with 6-fluoroanthraniloyl-AMP (crystal form 1) (PDB ID:5oe3)


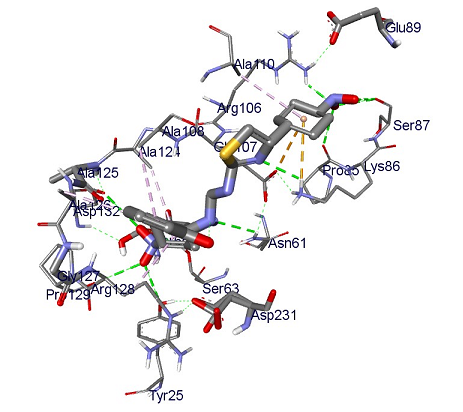

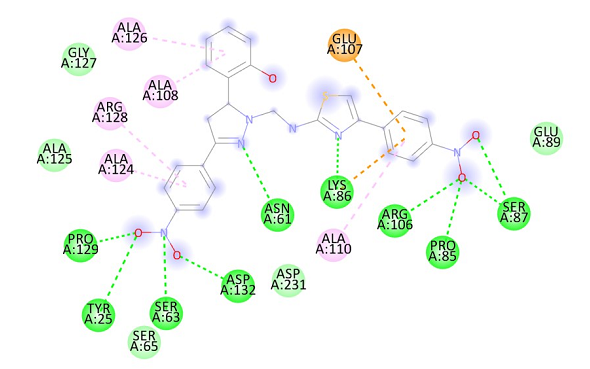


**Fig 9.** 3D (right) and 2D (left) representations of the binding interactions of **24**against N-terminal domain of PqsA in complex with 6-fluoroanthraniloyl-AMP (crystal form 1) (PDB ID:5oe3)


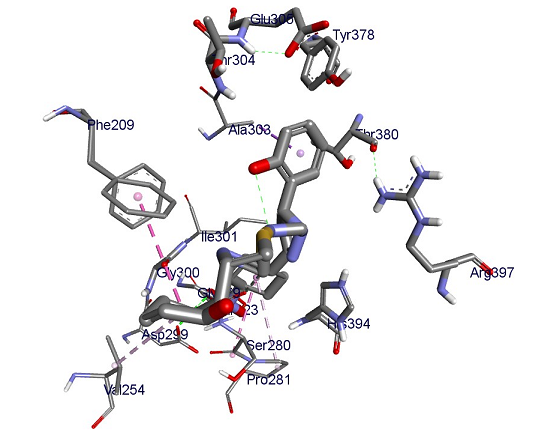

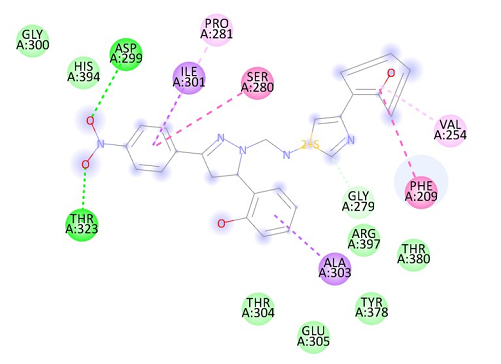


**Fig 10.** 3D (right) and 2D (left) representations of the binding interactions of **amoxicillin**against N-terminal domain of PqsA in complex with 6-fluoroanthraniloyl-AMP (crystal form 1) (PDB ID:5oe3)


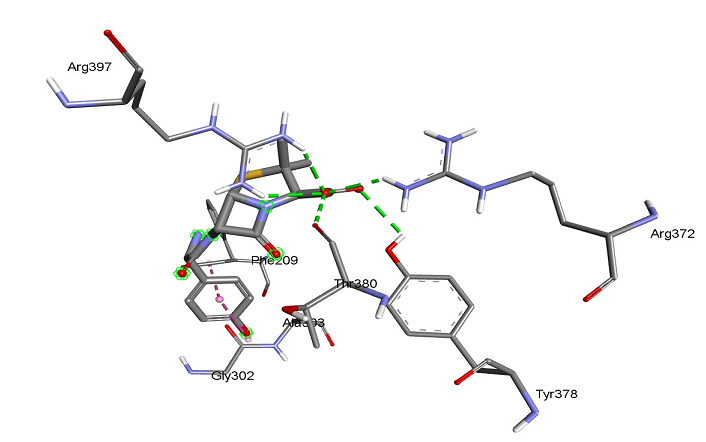

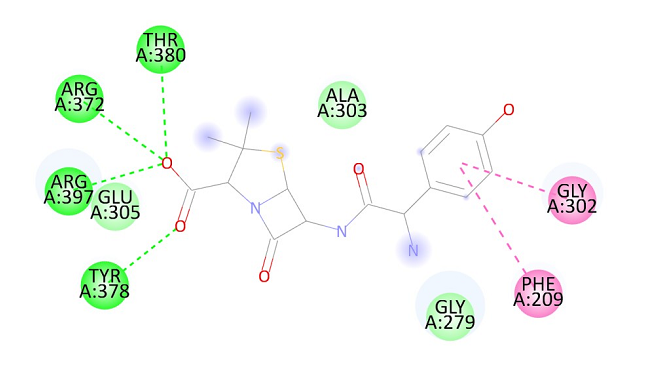


**Fig 5c, 1-10.** 3D (right) and 2D (left) representations of the binding interactions of **16-24**and amoxicillin against *S. aureus* Pyruvate Kinase in complex with a naturally occurring bis-indole alkaloid (PDB ID:3t07)

**Fig 1.** 3D (right) and 2D (left) representations of the binding interactions of **16**against *S. aureus* Pyruvate Kinase in complex with a naturally occurring bis-indole alkaloid (PDB ID:3t07)


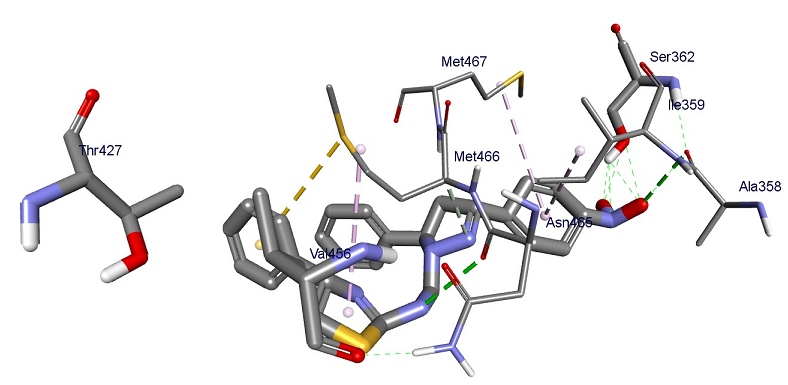

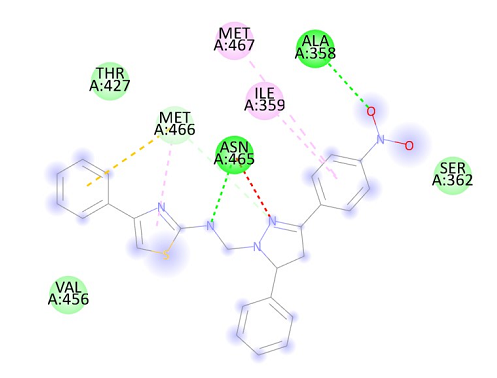


**Fig 2.** 3D (right) and 2D (left) representations of the binding interactions of **17**against *S. aureus* Pyruvate Kinase in complex with a naturally occurring bis-indole alkaloid (PDB ID:3t07)


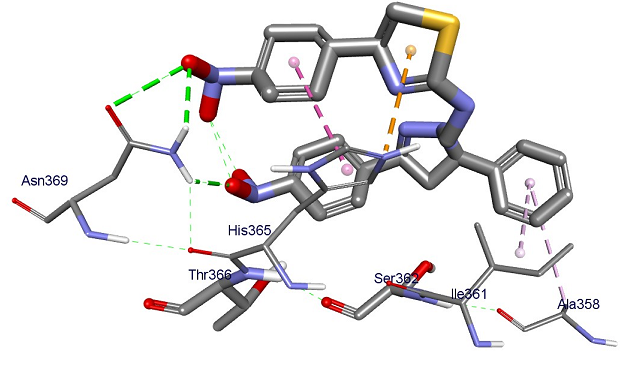

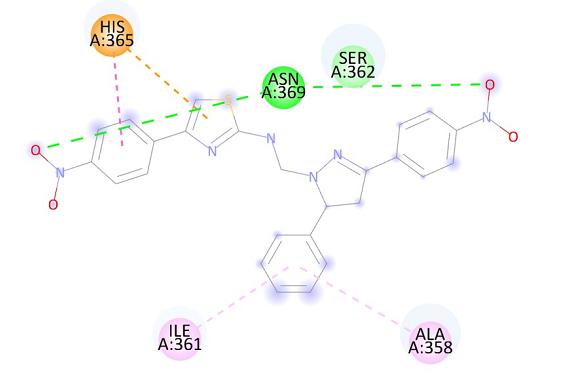


**Fig 3.** 3D (right) and 2D (left) representations of the binding interactions of **18** against *S. aureus* Pyruvate Kinase in complex with a naturally occurring bis-indole alkaloid (PDB ID:3t07)


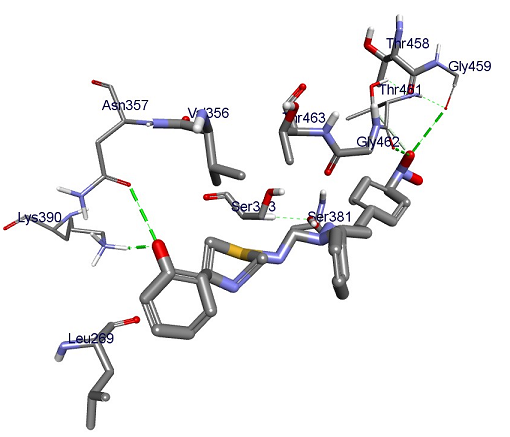

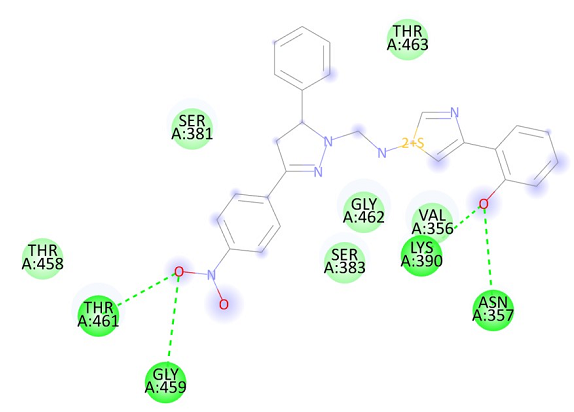


**Fig 4.** 3D (right) and 2D (left) representations of the binding interactions of **19**against *S. aureus* Pyruvate Kinase in complex with a naturally occurring bis-indole alkaloid (PDB ID:3t07)


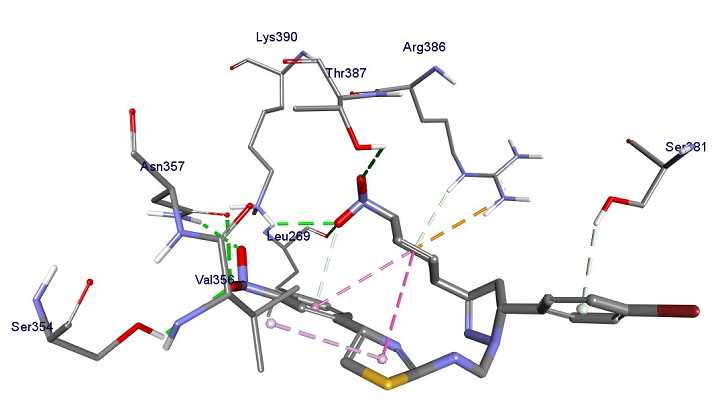

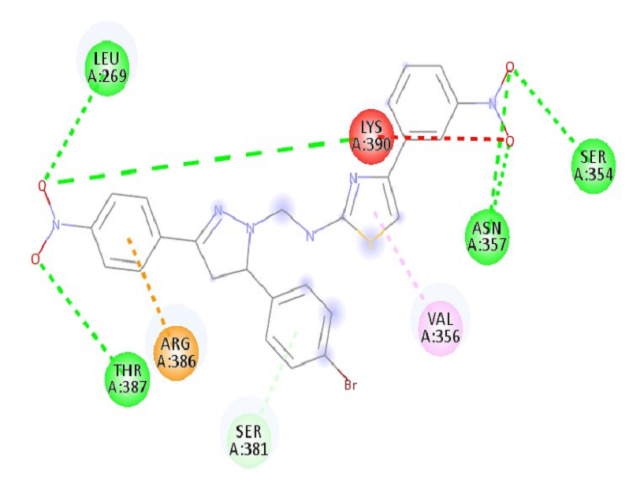


**Fig 5.** 3D (right) and 2D (left) representations of the binding interactions of **20**against *S. aureus* Pyruvate Kinase in complex with a naturally occurring bis-indole alkaloid (PDB ID:3t07)


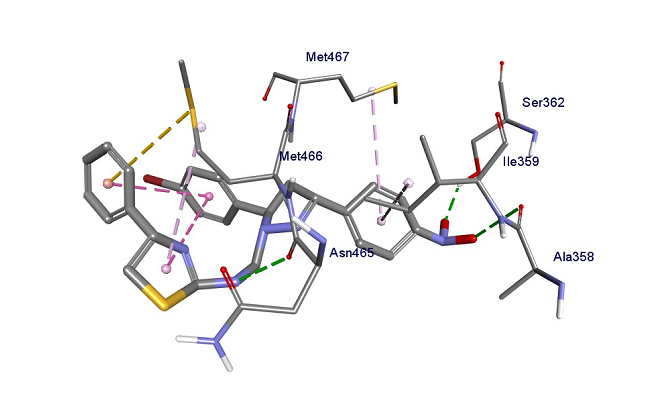

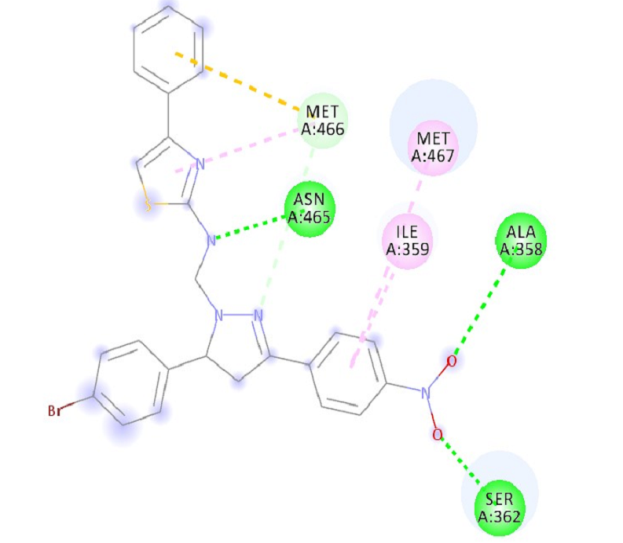


**Fig 6.** 3D (right) and 2D (left) representations of the binding interactions of **21**against *S. aureus* Pyruvate Kinase in complex with a naturally occurring bis-indole alkaloid (PDB ID:3t07)


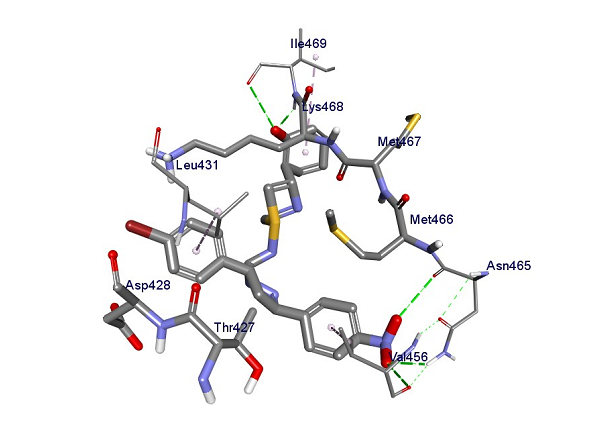

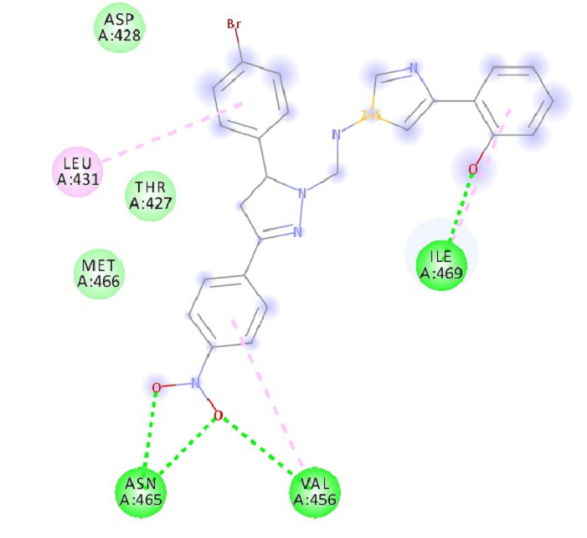


**Fig 7.** 3D (right) and 2D (left) representations of the binding interactions of **22**against*S. aureus* Pyruvate Kinase in complex with a naturally occurring bis-indole alkaloid (PDB ID:3t07)


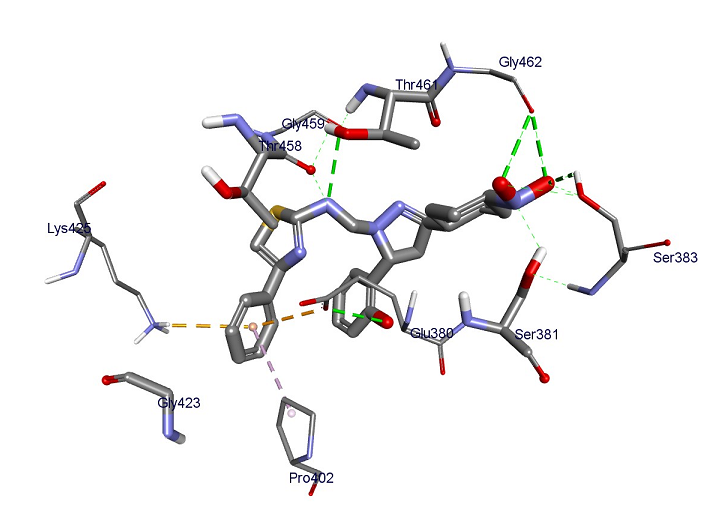

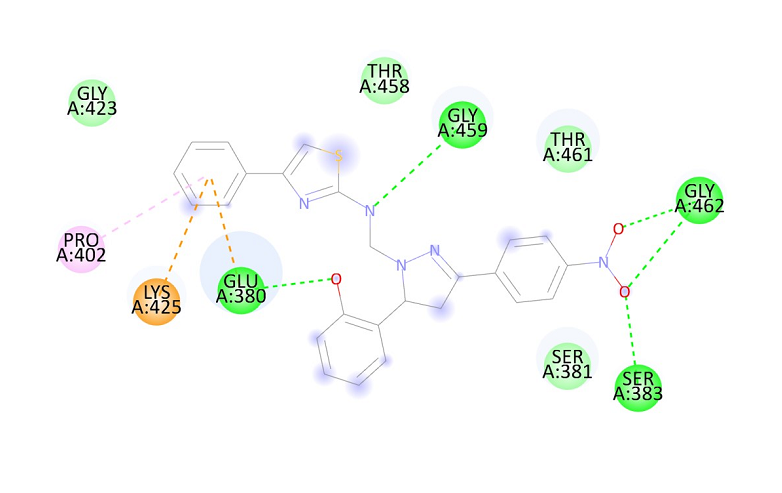


**Fig 8.** 3D (right) and 2D (left) representations of the binding interactions of **23**against *S. aureus* Pyruvate Kinase in complex with a naturally occurring bis-indole alkaloid (PDB ID:3t07)


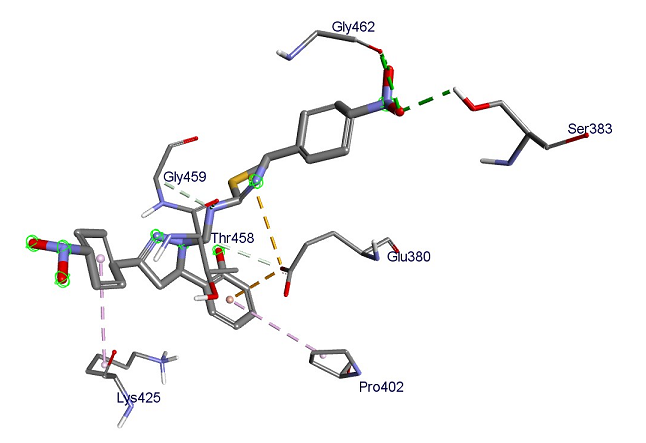

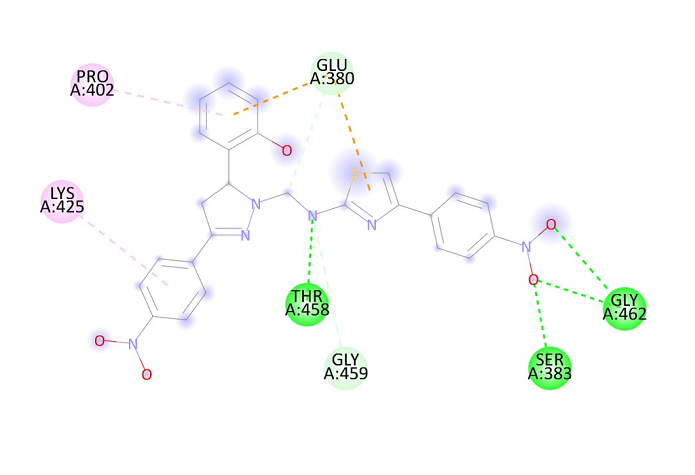


**Fig 9.** 3D (right) and 2D (left) representations of the binding interactions of **24**against *S. aureus* Pyruvate Kinase in complex with a naturally occurring bis-indole alkaloid (PDB ID:3t07)


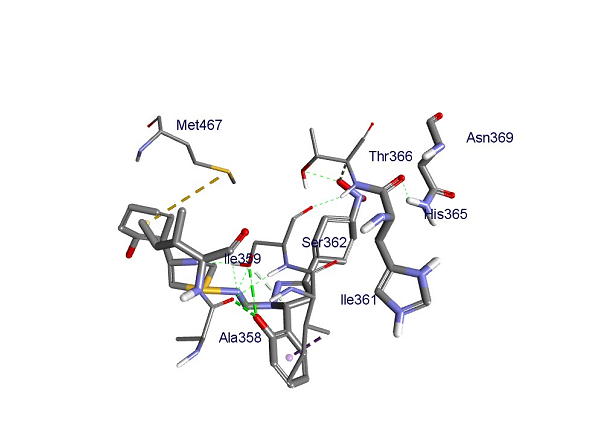

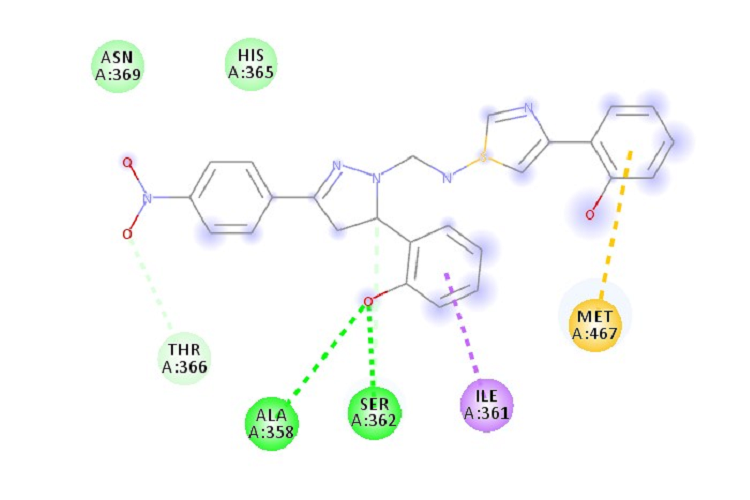


**Fig 10.** 3D (right) and 2D (left) representations of the binding interactions of **amoxicillin** against *S. aureus* Pyruvate Kinase in complex with a naturally occurring bis-indole alkaloid (PDB ID:3t07)


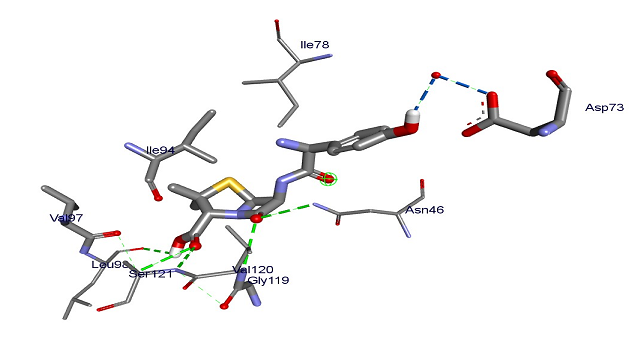

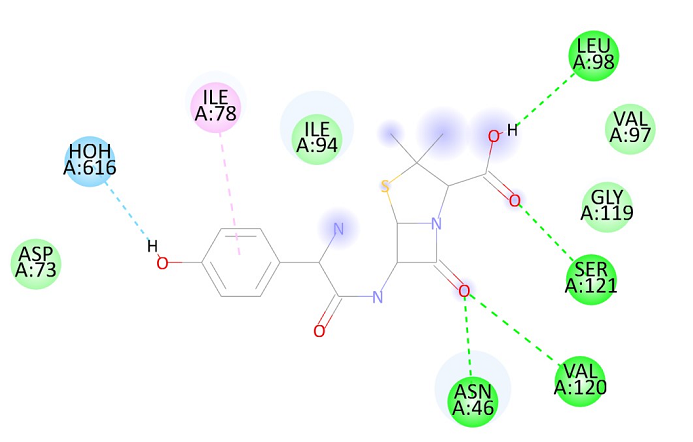


**Fig5d, 1-10.** 3D (right) and 2D (left) representations of the binding interactions of **16-24**and amoxicillin against LuxS of *S. pyogenes* (Uniprot id: P0C0C7)

**Fig 1.** 3D (right) and 2D (left) representations of the binding interactions of **16**againstLuxS of *S. pyogenes* (Uniprot id: P0C0C7)


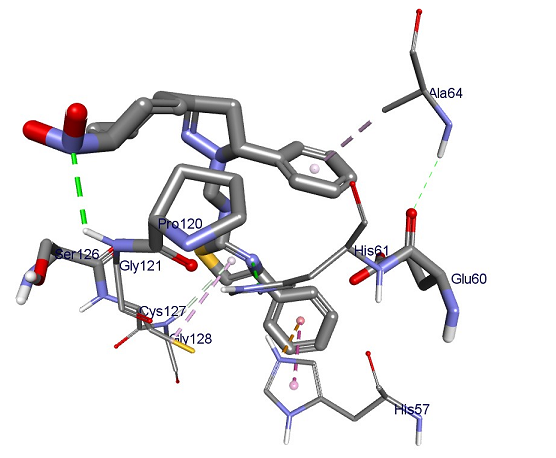

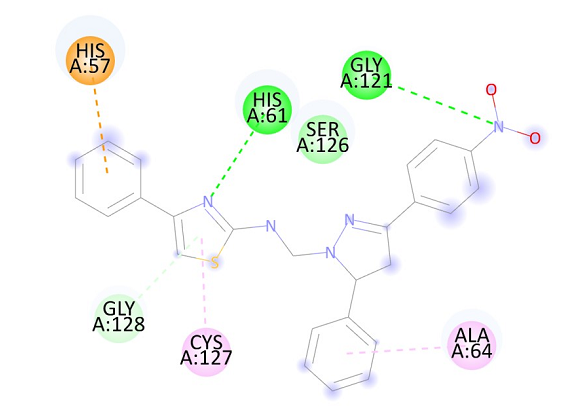


**Fig 2.** 3D (right) and 2D (left) representations of the binding interactions of **17**against LuxS of *S. pyogenes* (Uniprot id: P0C0C7)


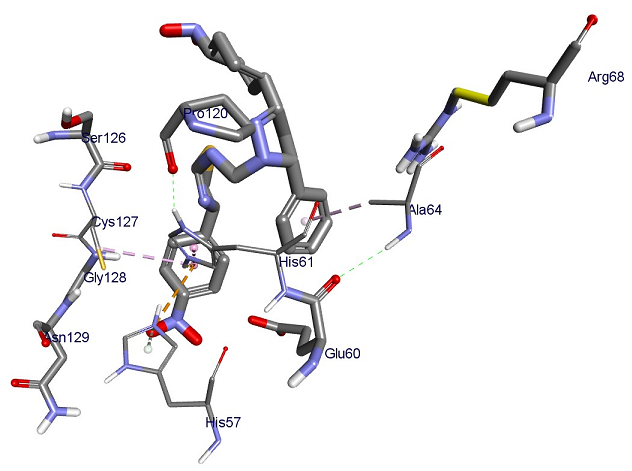

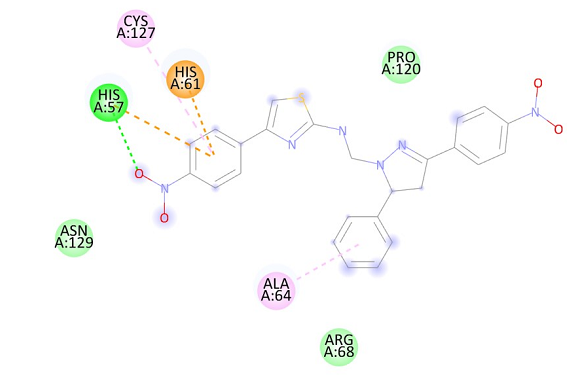


**Fig 3.** 3D (right) and 2D (left) representations of the binding interactions of **18**against LuxS of *S. pyogenes* (Uniprot id: P0C0C7)


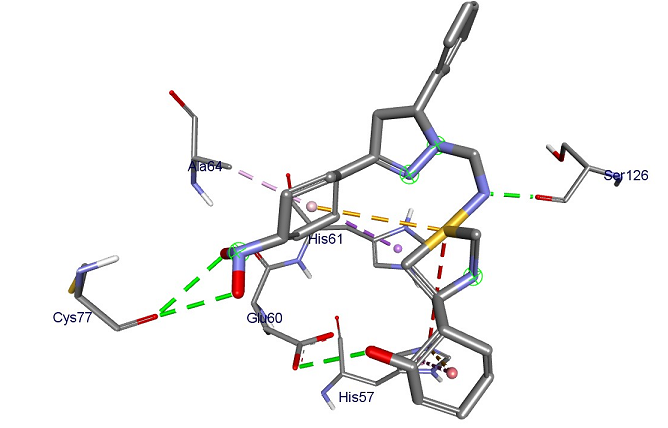

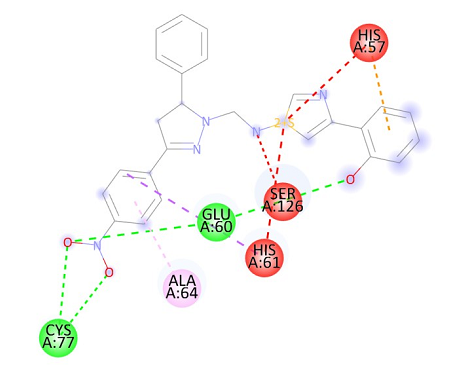


**Fig 4.** 3D (right) and 2D (left) representations of the binding interactions of **19**againstLuxS of *S. pyogenes* (Uniprot id: P0C0C7)


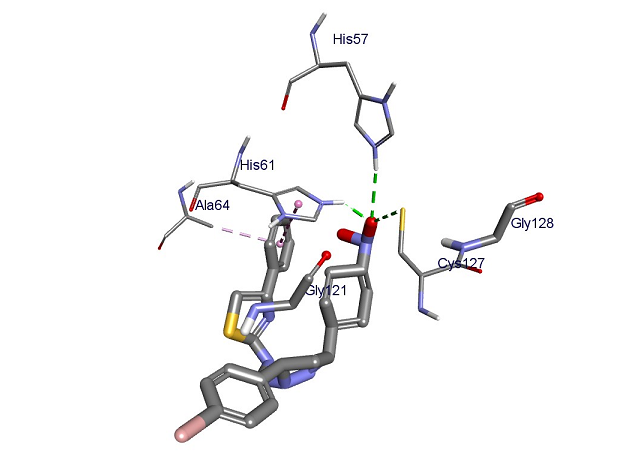

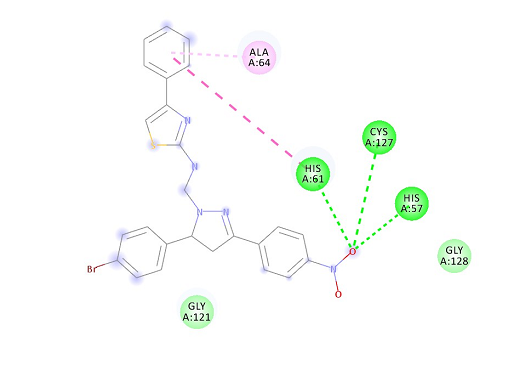


**Fig 5.** 3D (right) and 2D (left) representations of the binding interactions of **20**againstLuxS of *S. pyogenes* (Uniprot id: P0C0C7)


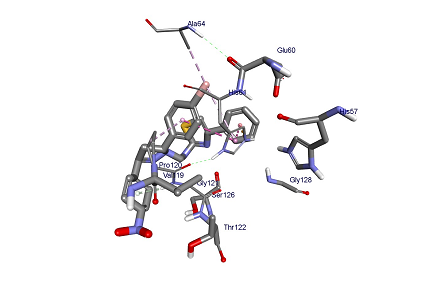

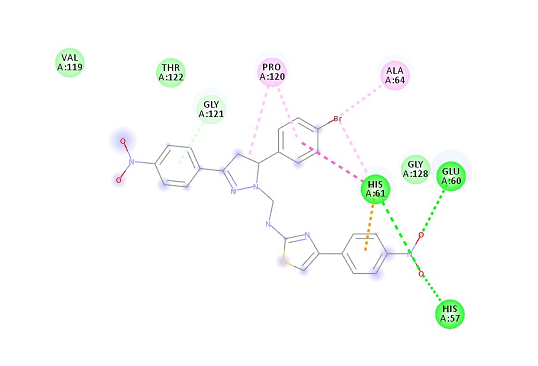


**Fig 6.** 3D (right) and 2D (left) representations of the binding interactions of **21**against LuxS of *S. pyogenes* (Uniprot id: P0C0C7)


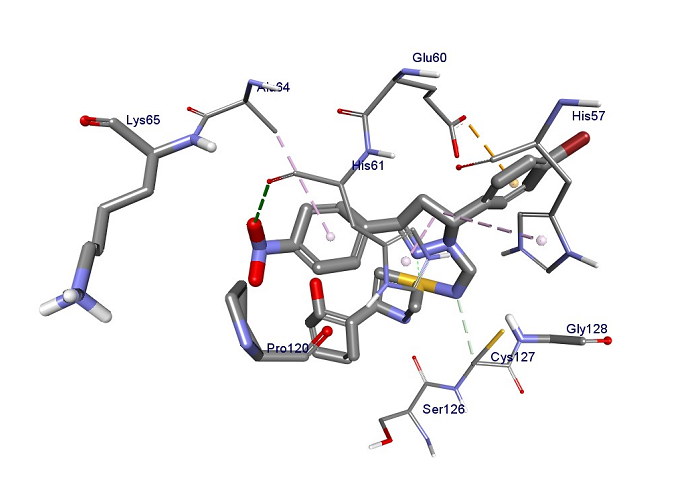

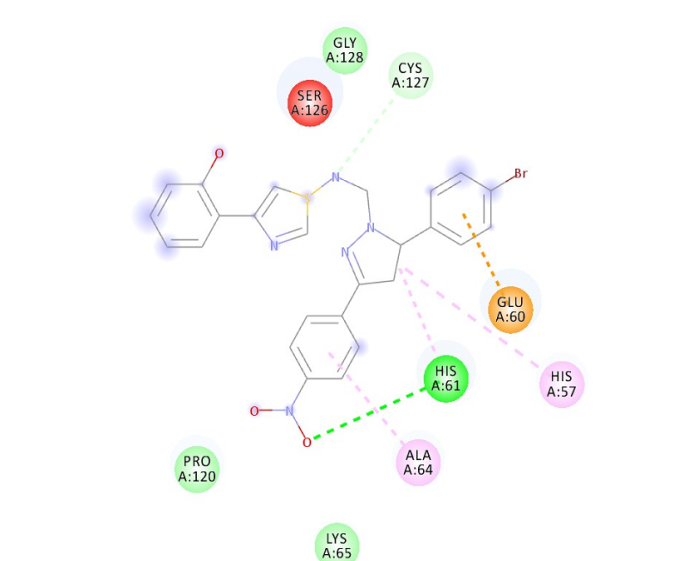


**Fig 7.** 3D (right) and 2D (left) representations of the binding interactions of **22**againstLuxS of *S. pyogenes* (Uniprot id: P0C0C7)


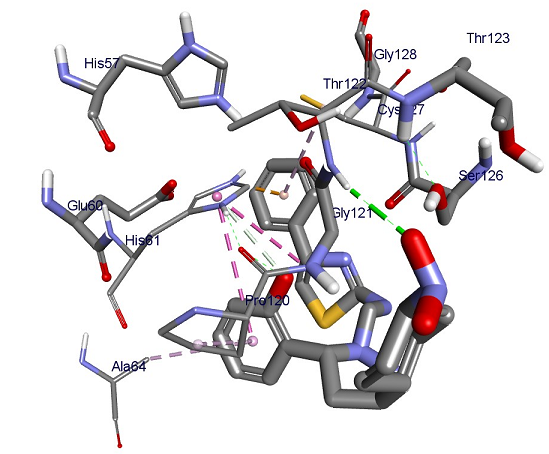


**Fig 8.** 3D (right) and 2D (left) representations of the binding interactions of **23**against LuxS of *S. pyogenes* (Uniprot id: P0C0C7)

**Fig 9.** 3D (right) and 2D (left) representations of the binding interactions of **24**against LuxS of *S. pyogenes* (Uniprot id: P0C0C7)

**Fig 10.** 3D (right) and 2D (left) representations of the binding interactions of **amoxicillin** against LuxS of *S. pyogenes* (Uniprot id: P0C0C7)

**Fig 5e, 1-10.** 3D (right) and 2D (left) representations of the binding interactions of **16-24**and amoxicillin against Human peroxiredoxin 5 (PDB ID: 1hd2).

**Fig 1.** 3D (right) and 2D (left) representations of the binding interactions of **16**against Human peroxiredoxin 5 (PDB ID: 1hd2).

**Fig 2.** 3D (right) and 2D (left) representations of the binding interactions of **17**againstHuman peroxiredoxin 5 (PDB ID: 1hd2).

**Fig 3.** 3D (right) and 2D (left) representations of the binding interactions of **18**against Human peroxiredoxin 5 (PDB ID: 1hd2).

**Fig 4.** 3D (right) and 2D (left) representations of the binding interactions of **19**against Human peroxiredoxin 5 (PDB ID: 1hd2).

**Fig 5.** 3D (right) and 2D (left) representations of the binding interactions of **20**against Human peroxiredoxin 5 (PDB ID: 1hd2).

**Fig 6.** 3D (right) and 2D (left) representations of the binding interactions of **21**against Human peroxiredoxin 5 (PDB ID: 1hd2).

**Fig 7.** 3D (right) and 2D (left) representations of the binding interactions of **22**against Human peroxiredoxin 5 (PDB ID: 1hd2).

**Fig 8.** 3D (right) and 2D (left) representations of the binding interactions of **23**against Human peroxiredoxin 5 (PDB ID: 1hd2).

**Fig 9.** 3D (right) and 2D (left) representations of the binding interactions of **24**against Human peroxiredoxin 5 (PDB ID: 1hd2).

**Fig 10.** 3D (right) and 2D (left) representations of the binding interactions of **vitamin C** against Human peroxiredoxin 5 (PDB ID: 1hd2).
